# Supplementary material
Source: PubMed Central journal article supplement (PMC3958060)
Supplement: JVI.02163-13_zjv999098728so1.pdf [file JVI.02163-13_zjv999098728so1.pdf]

## SOM

**FIG S1.** Maximum likelihood (ML) trees of the PB2 (A), PB1 (B), PA (C), HA (D), NP (E), NA (F), M (G), and NS (H) segments. The reliability of all phylogenetic groupings of each tree was determined through a non-parametric bootstrap resampling analysis with Garli: 1000 replicates of ML trees were analyzed by applying GTR+ $\Gamma$ 4+I model of nucleotide substitution. Bootstrap values with a support of  $\geq 70\%$  are depicted on the ML trees. Scale bars roughly represent 5% of nucleotide substitutions between close relatives. The color-coding of viruses is based on the antigenic clusters of HA (1, 2). The images can be zoomed to show details.

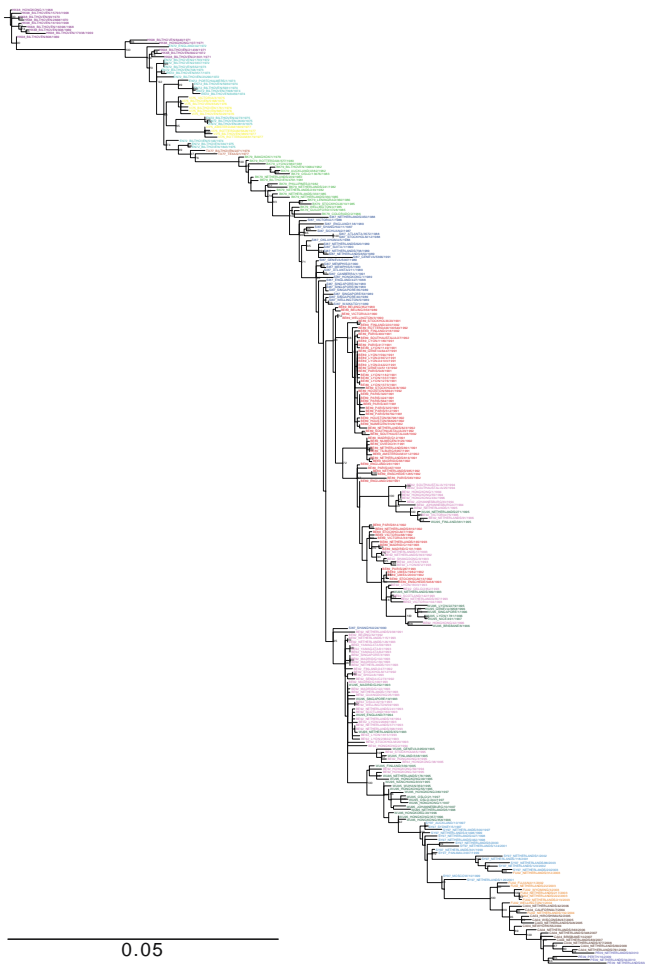

**FIG S1A.**

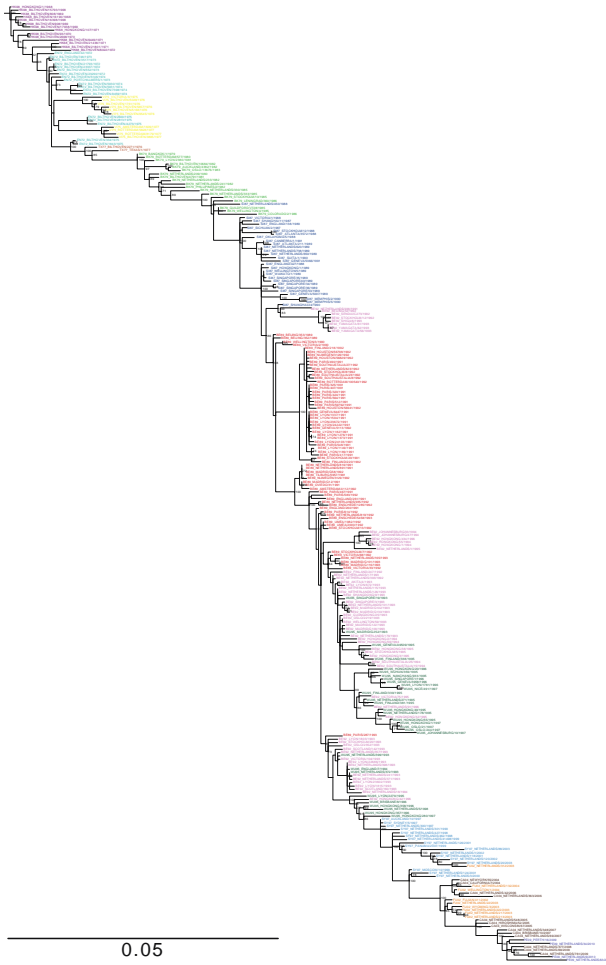

**FIG S1B.**

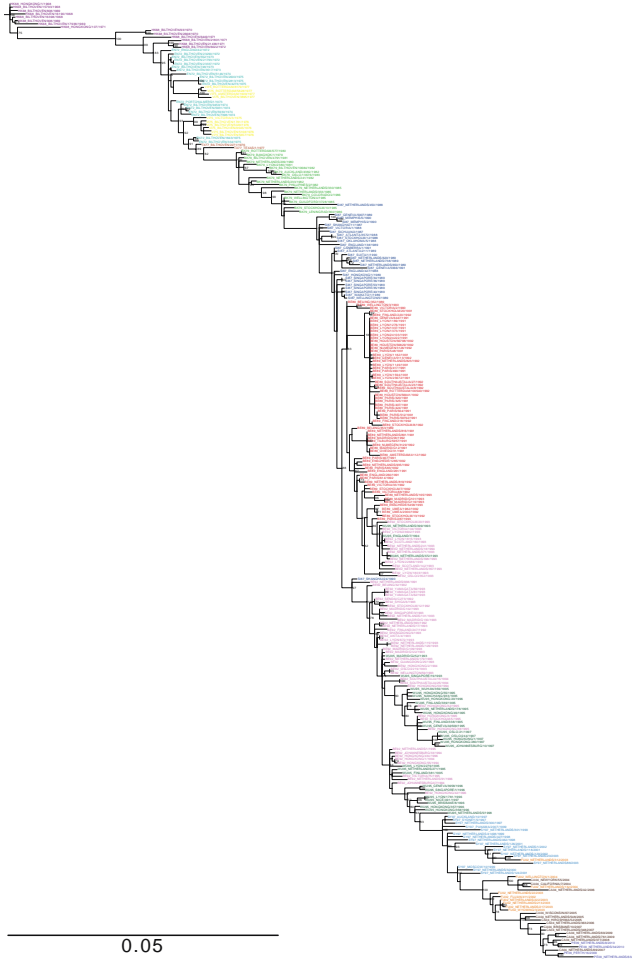

**FIG S1C.**

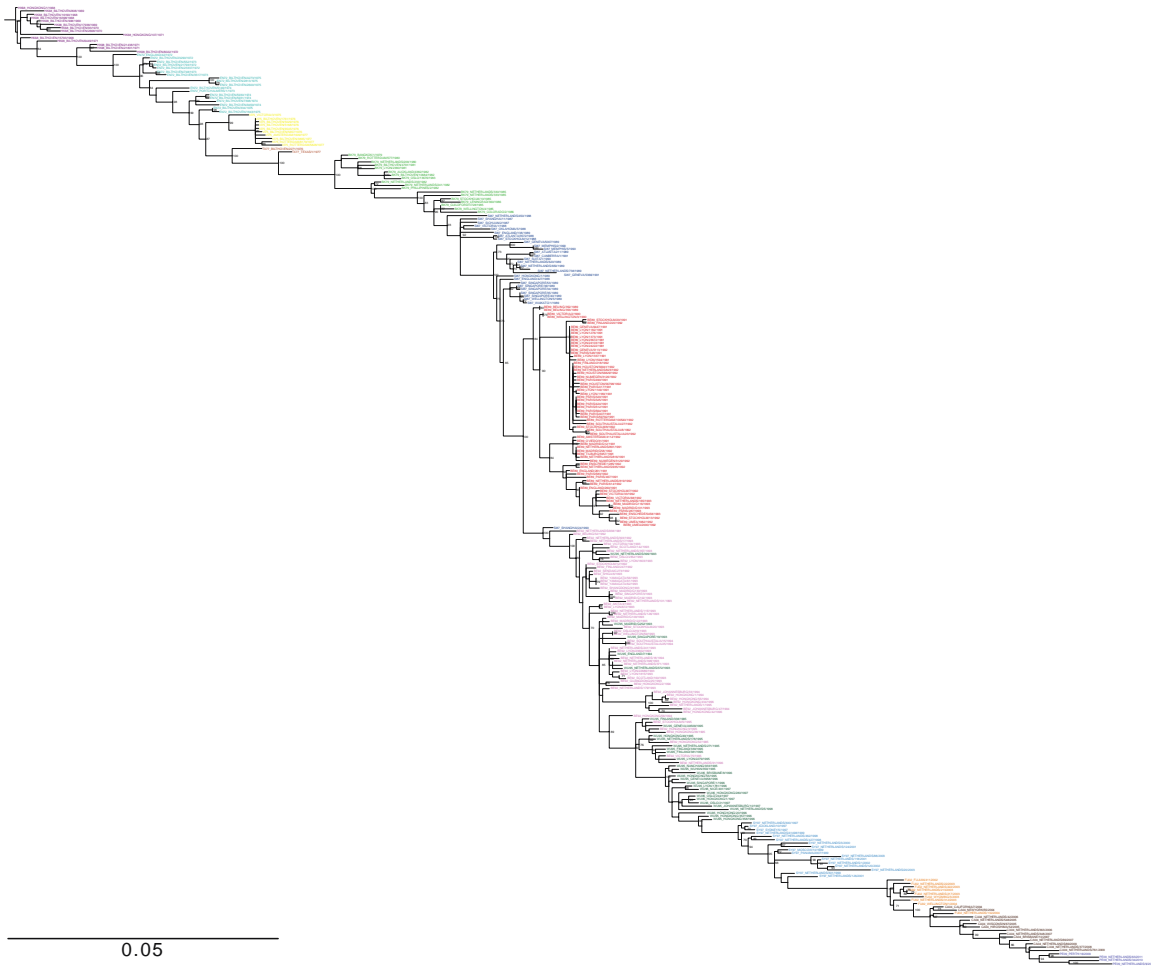

**FIG S1D.**

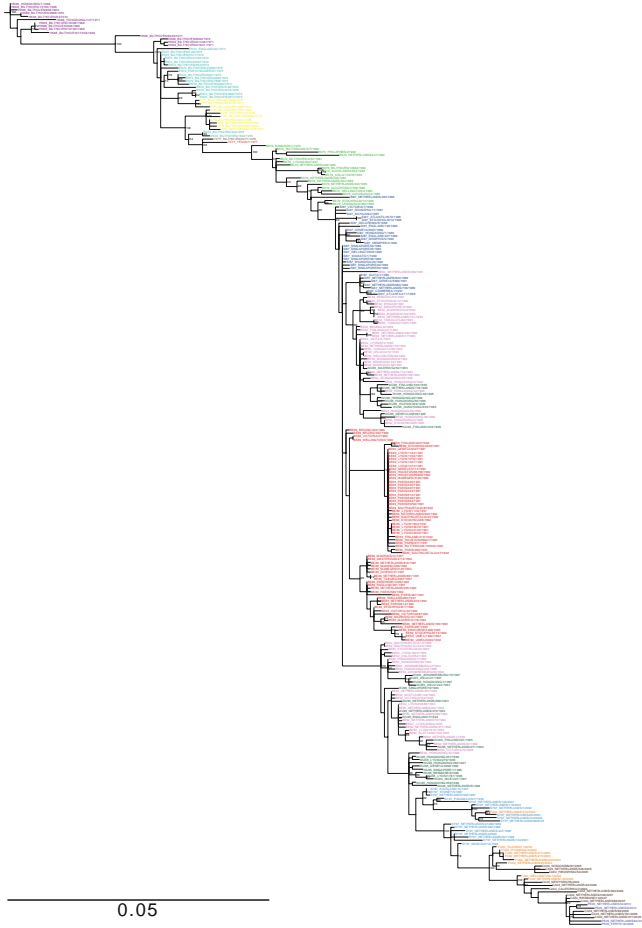

**FIG S1E.**

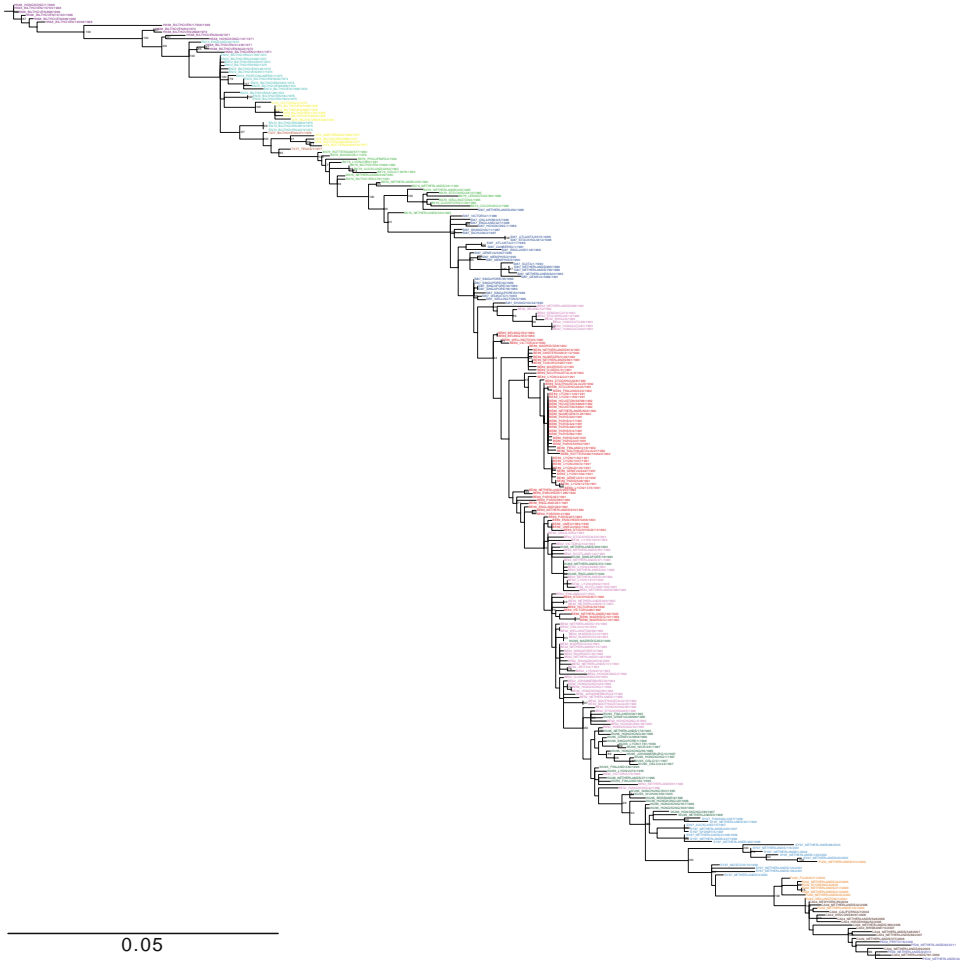

**FIG S1F.**

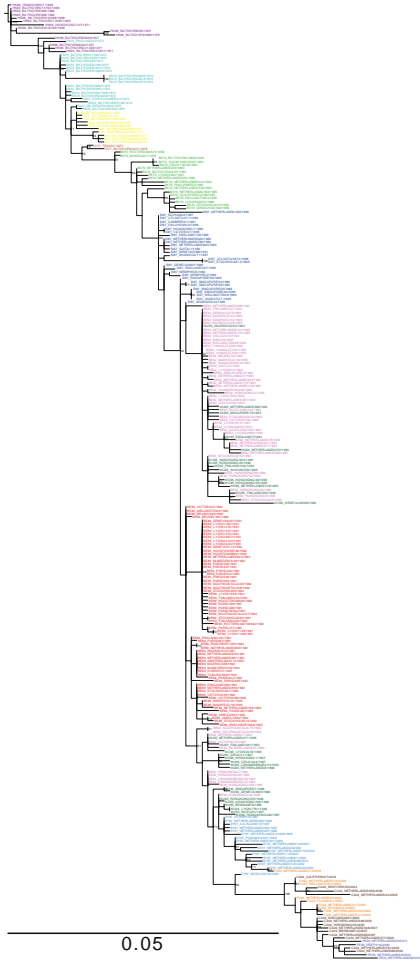

**FIG S1G.**

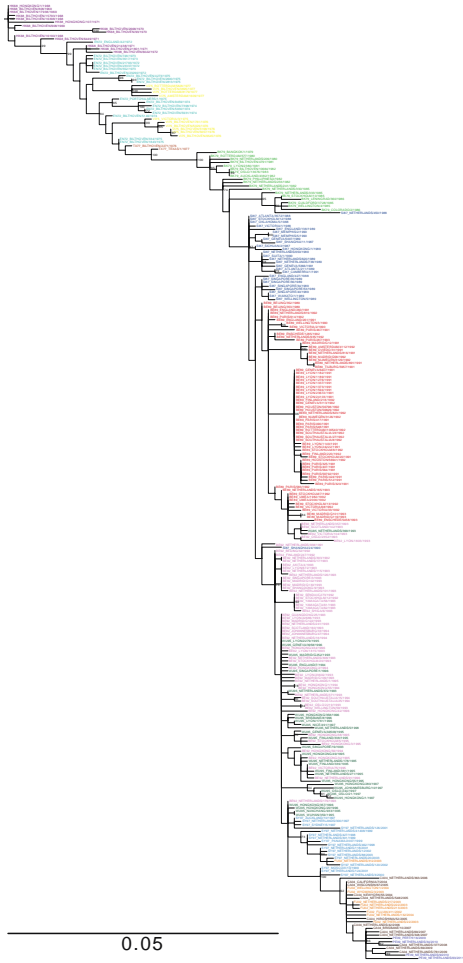

**FIG S1H.**



**FIG S2.** Alignments of PB2 (A), PB1 (B, left panel), PB1-F2 (B, right panel), PA (C, left panel), PA-X (C, right panel), HA (D), NP (E), NA (F), M1 (G, left panel), M2 (G, right panel), NS2 (H, left panel), and NEP (H, right panel) of A(H3N2) viruses used in this study. Alignments are grouped and color-coded according to the year of isolation and the antigenic clusters of HA (1, 2). PB1-N4 (B, left panel), PA-N155 (C, left panel), PA-N182 (C, left panel), HA1 (D), and HA2 (D) are indicated with a black border. Stop codons are shown as asterisks and within black borders. Codons in which there were no amino acid substitutions were excluded. The images can be zoomed to show details.

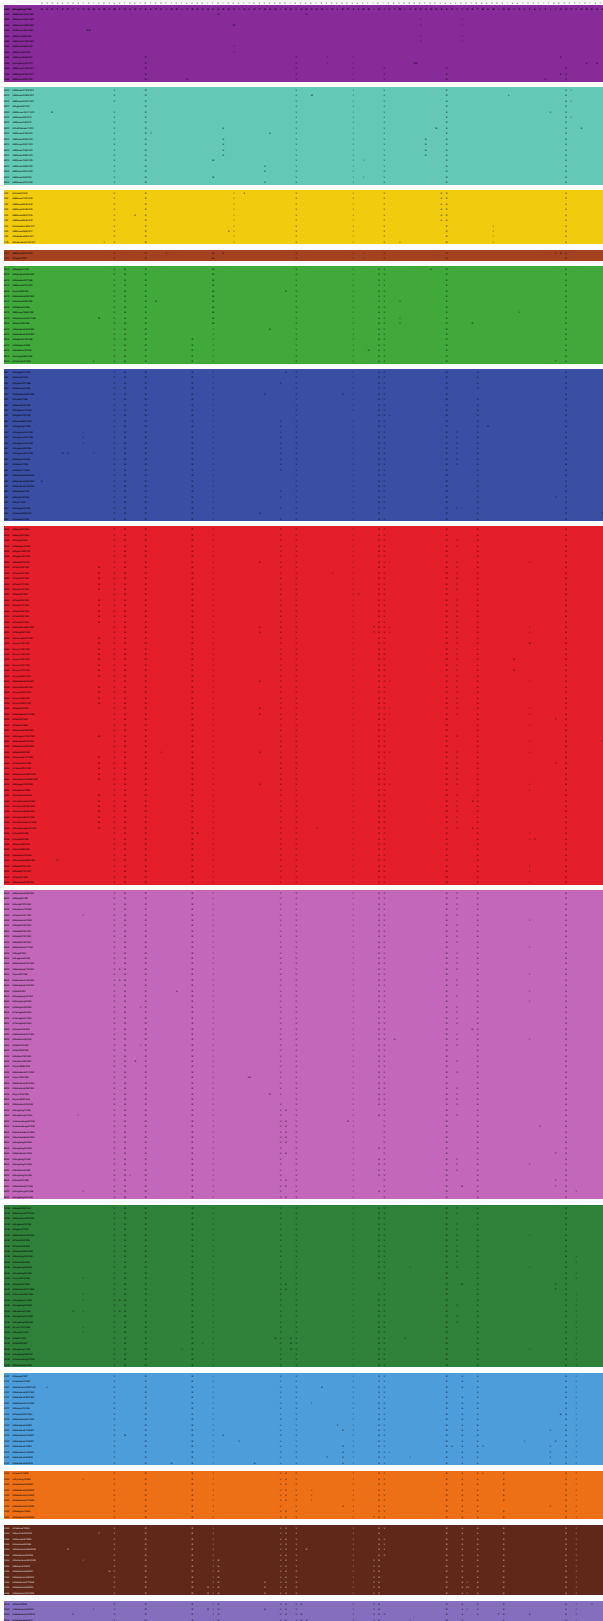

**FIG S2A.**

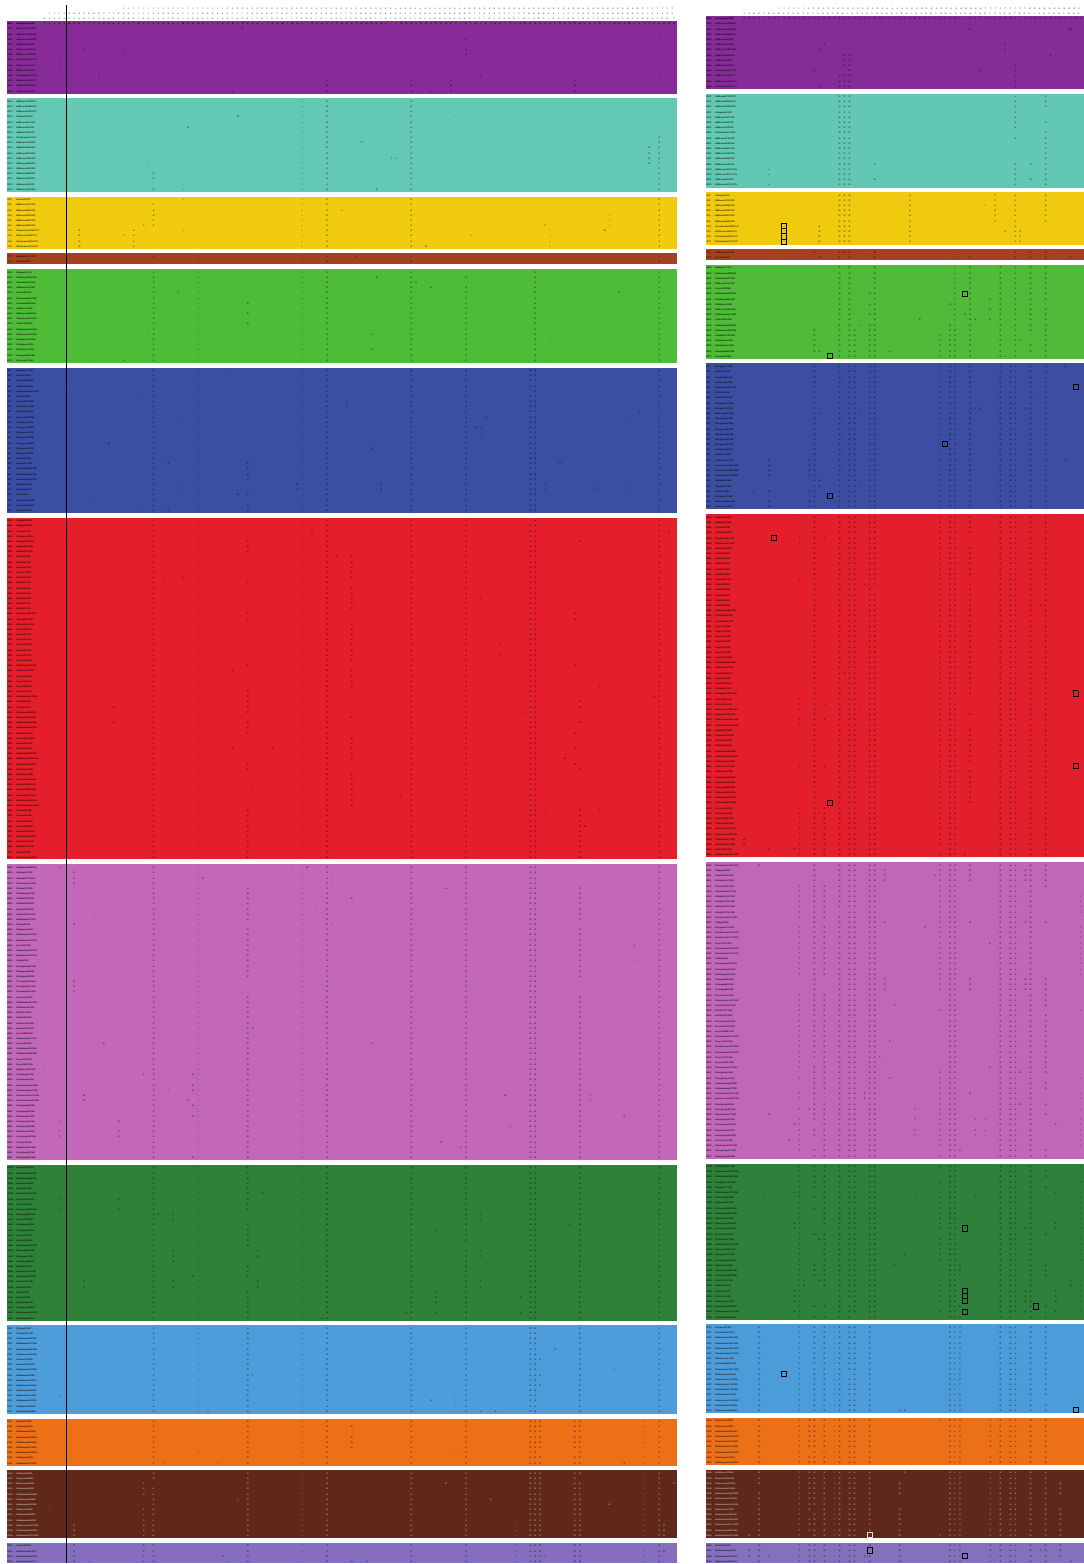

FIG S2B.

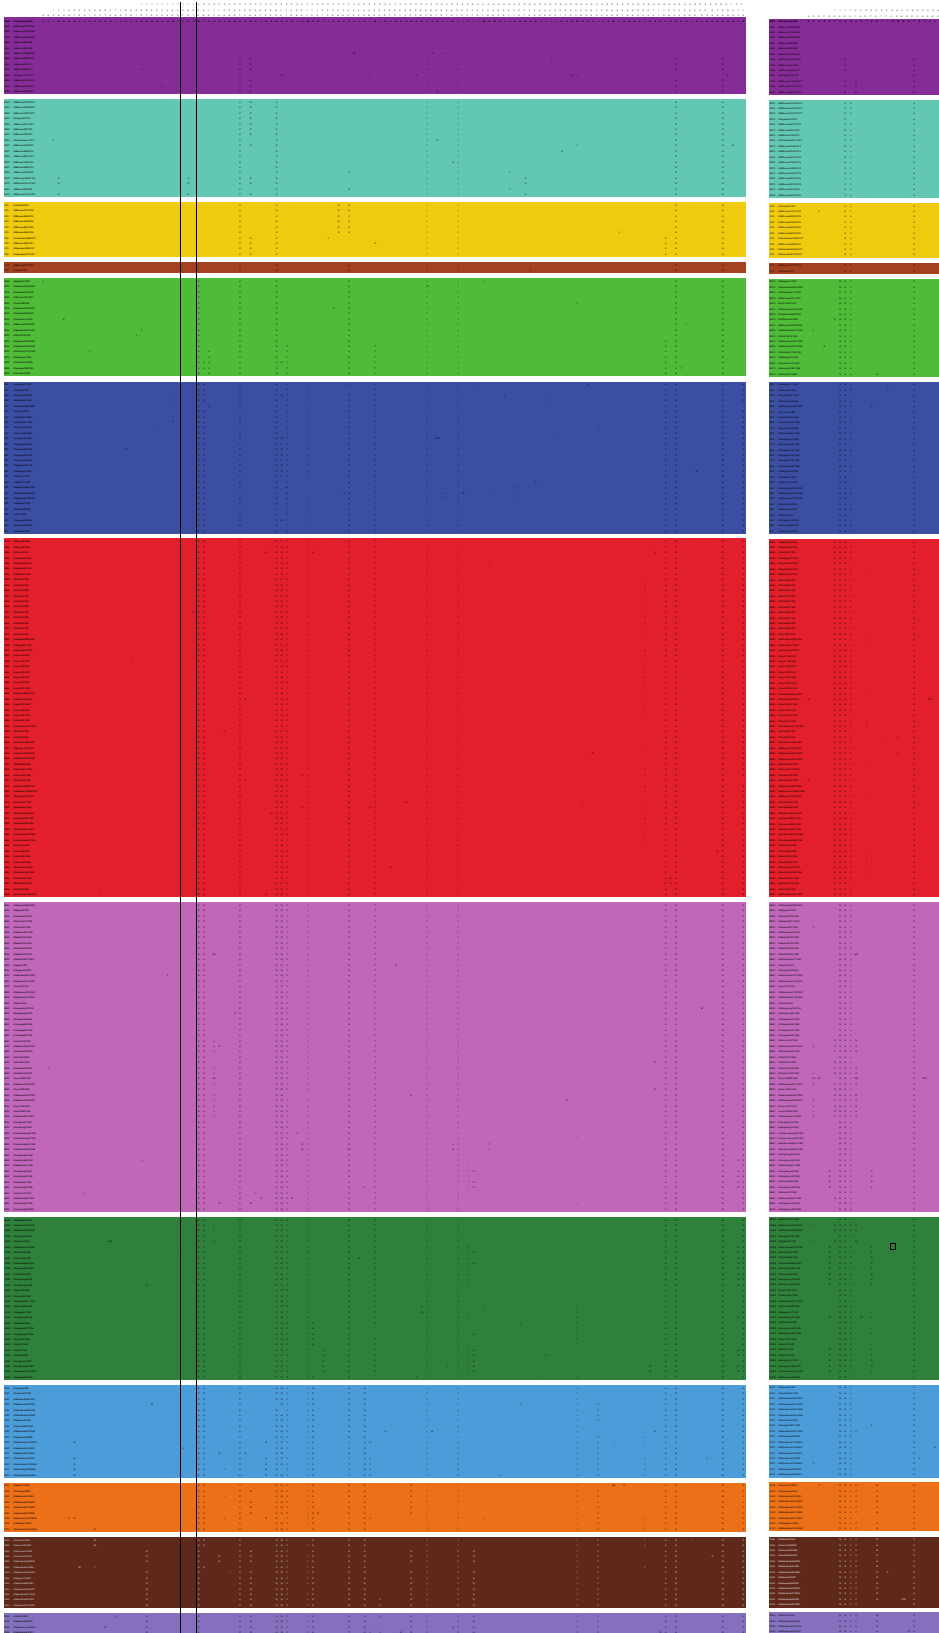

**FIG S2C.**

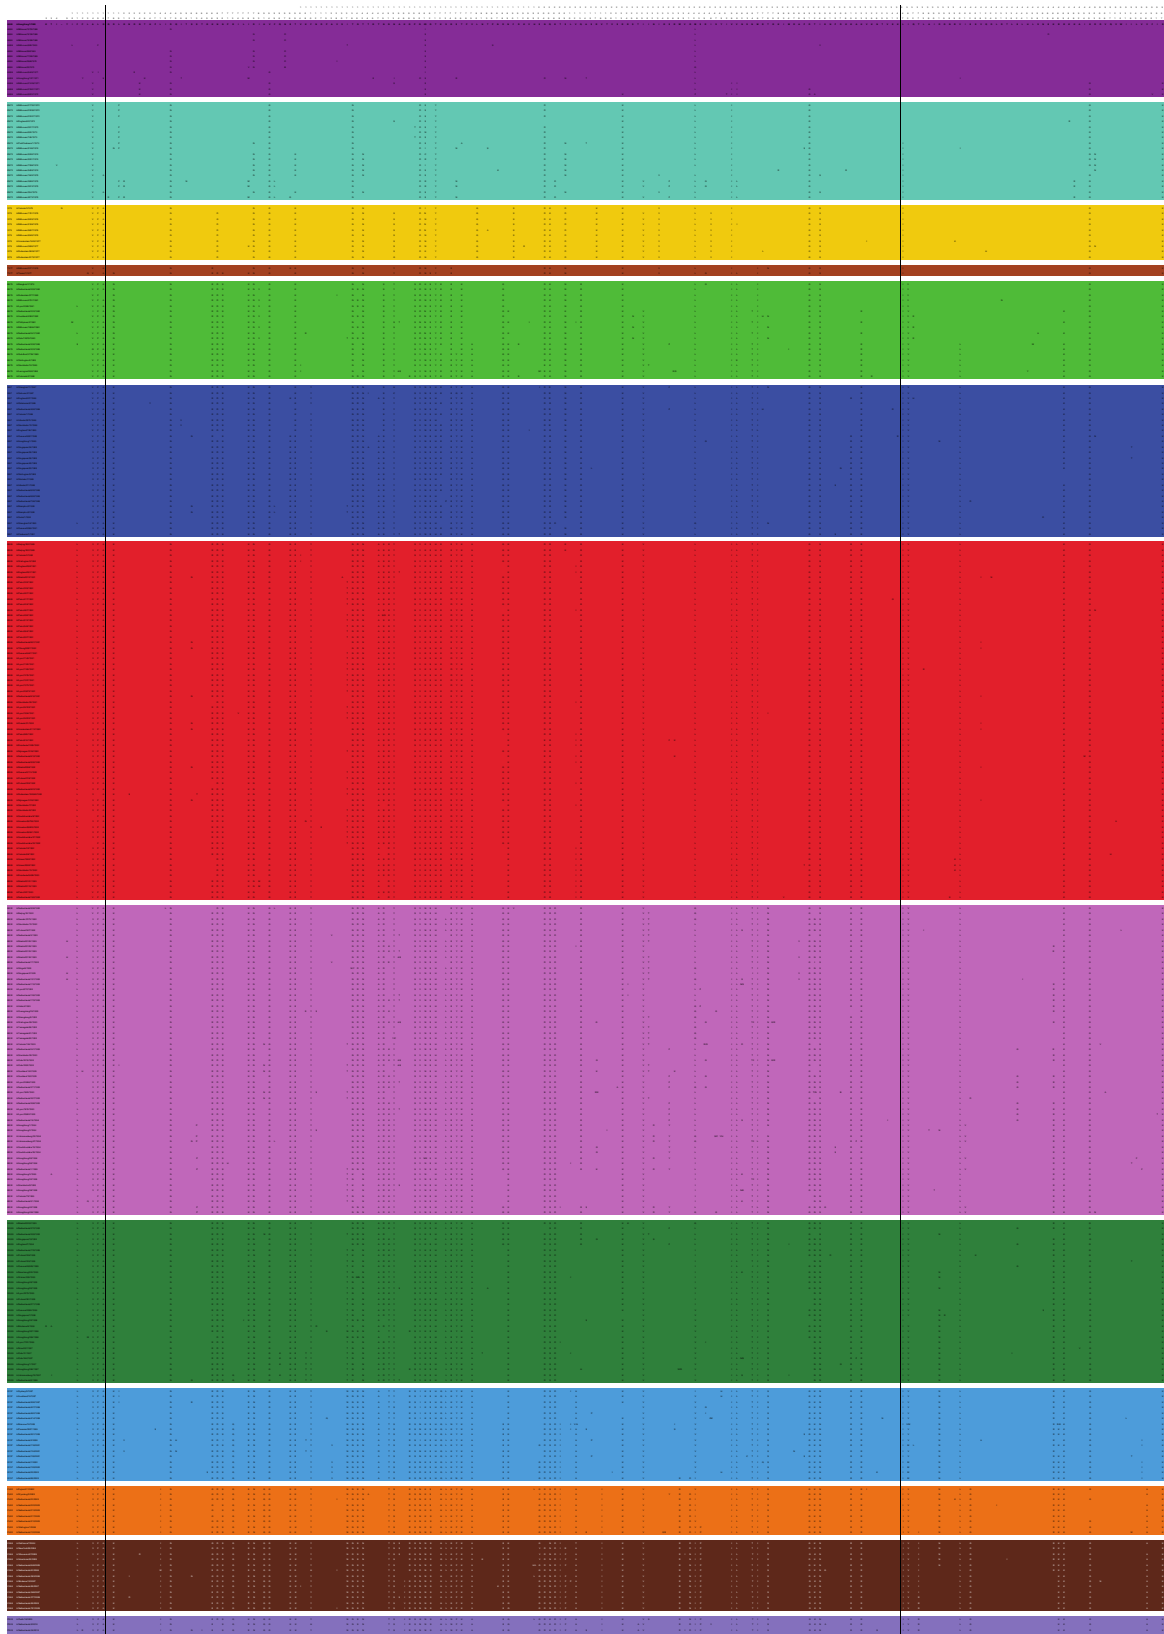

**FIG S2D.**

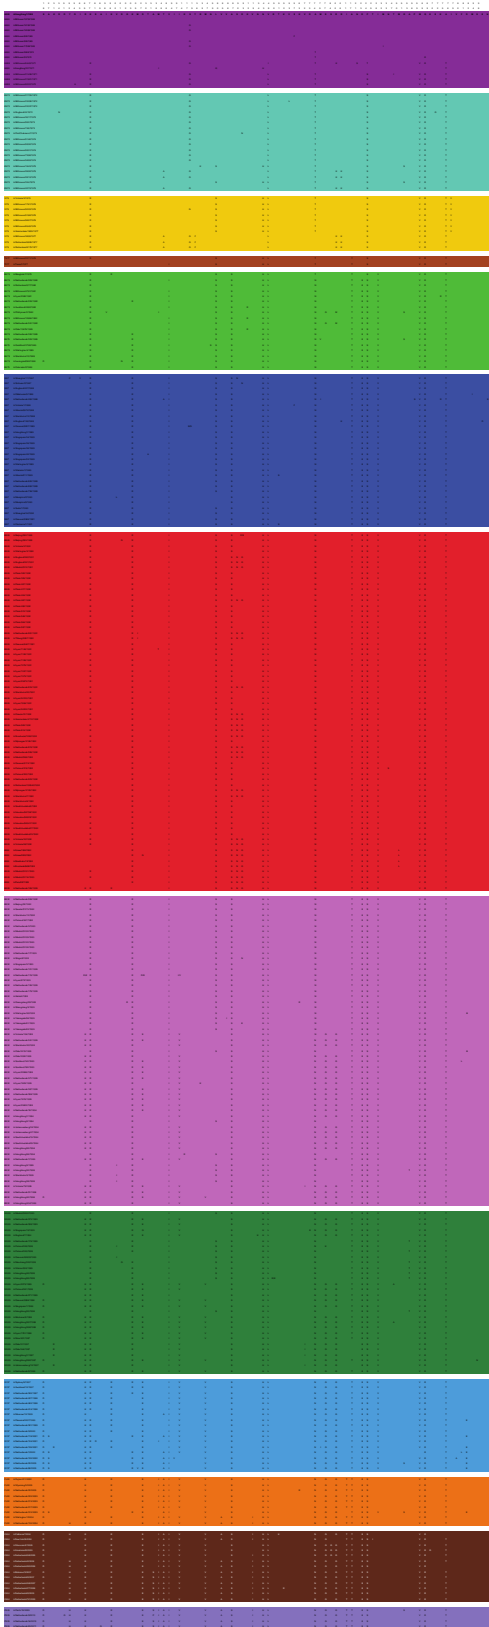

**FIG S2E.**

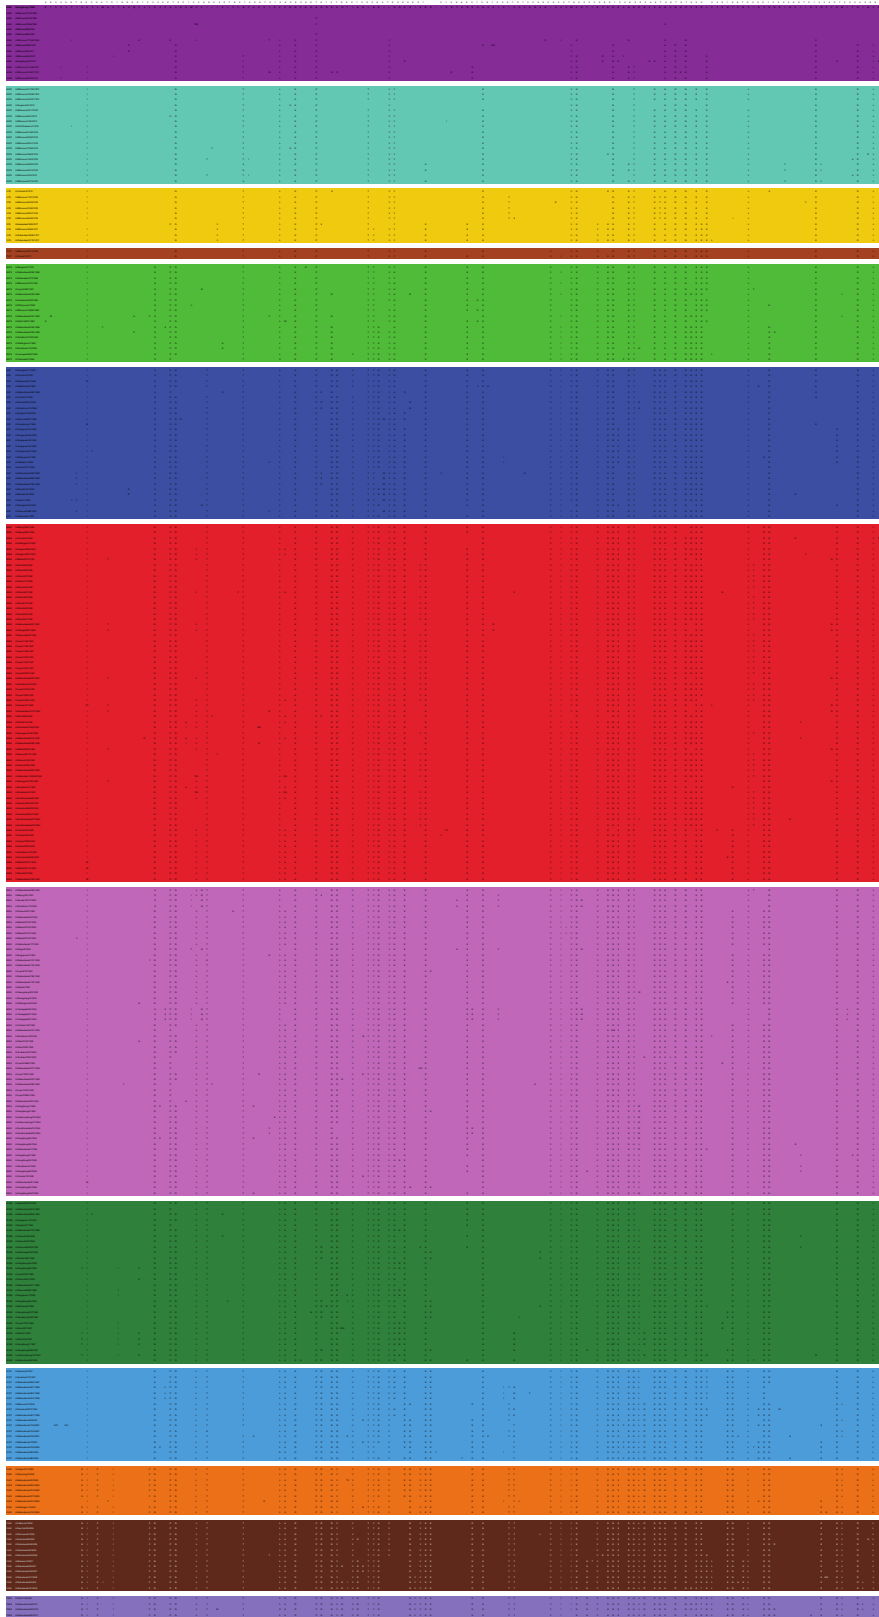

**FIG S2F.**

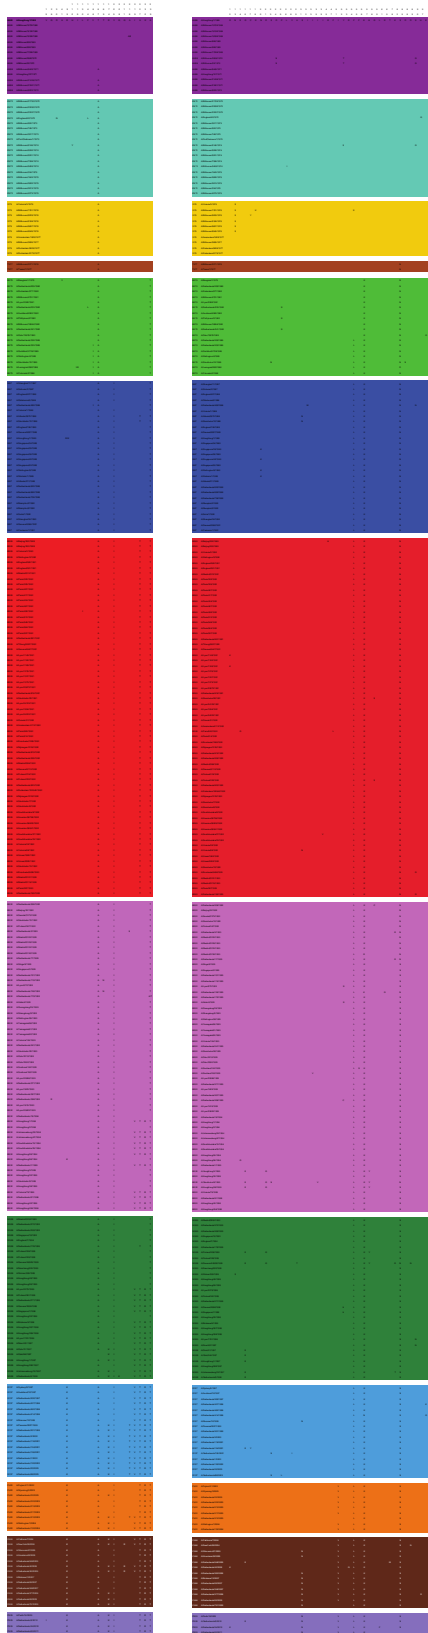

**FIG S2G.**



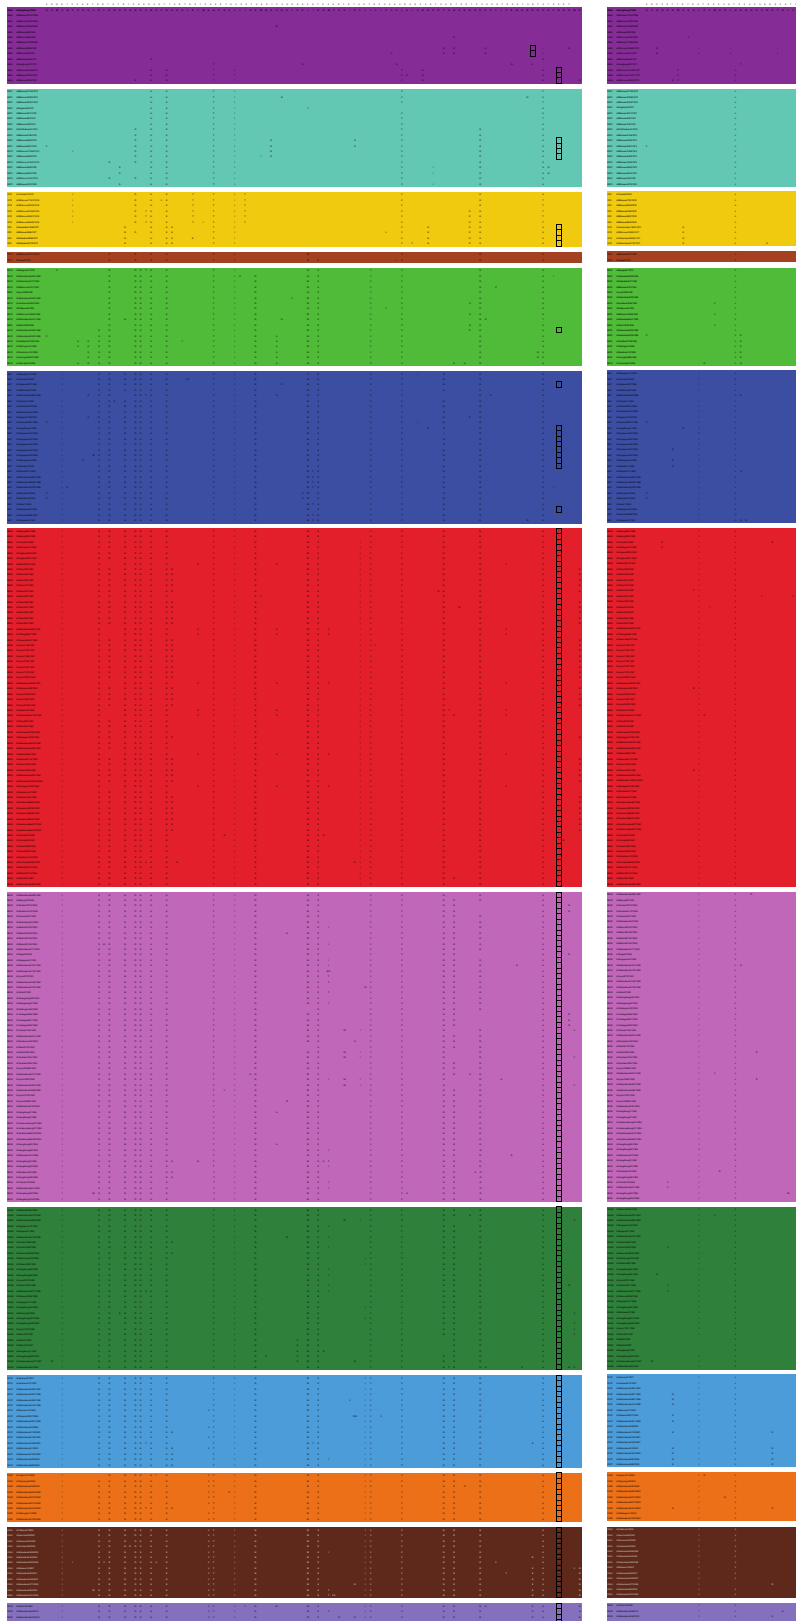

**FIG S2H.**

**TABLE S1. The ORFs of A(H3N2) virus.**

| Segment | Gene | Length (bp) | ORF                   | Protein (length in aa) |
|---------|------|-------------|-----------------------|------------------------|
| 1       | PB2  | 2341        | 28..2307              | PB2 (759)              |
|         |      |             | 25..2298              | PB1 (757)              |
| 2       | PB1  | 2341        | 142..2298             | PB1-N40 (718)          |
|         |      |             | 119..391              | PB1-F2 (90)            |
| 3       | PA   | 2233        | 25..2175              | PA (716)               |
|         |      |             | 487..2175             | PA-N155 (562)          |
|         |      |             | 568..2175             | PA-N182 (535)          |
|         |      |             | 599..781              | PA-X (61)              |
| 4       | HA   | 1765        | 30..1730              | HA (566)               |
| 5       | NP   | 1566        | 46..1542              | NP (498)               |
| 6       | NA   | 1468        | 20..1429              | NA (469)               |
| 7       | MP   | 1027        | 26..784               | M1 (252)               |
|         |      |             | 26..51 join 740..1007 | M2 (97)                |
| 8       | NS   | 890         | 27..740               | NS2 (237) <sup>a</sup> |
|         |      |             | 27..719               | NS2 (230) <sup>b</sup> |
|         |      |             | 27..689               | NS2 (220) <sup>c</sup> |
|         |      |             | 27..56 join 529..864  | NS2 (121)              |

<sup>a</sup> Circulating in 1968 - 1991

<sup>b</sup> Circulating in 1971 - 2011

<sup>c</sup> Circulating in 1970

bp, Base pair

aa, Amino acid

**TABLE S2.** Best-fit models of protein evolution based on the Akaike information criterion.

| Segment | Length (aa) | Model                | lnL       |
|---------|-------------|----------------------|-----------|
| PB2     | 759         | FLU+I+ $\Gamma$ 4+F  | -3588.624 |
| PB1     | 757         | FLU+I+ $\Gamma$ 4+F  | -3845.97  |
| PB1-N40 | 718         | FLU+I+ $\Gamma$ 4+F  | -3654.85  |
| PB1-F2  | 90          | HIVw+ $\Gamma$ 4     | -1344.21  |
| PA      | 716         | HIVb+I+ $\Gamma$ 4+F | -3723.65  |
| PA-N155 | 562         | HIVb+I+ $\Gamma$ 4+F | -2986.37  |
| PA-N182 | 535         | HIVb+I+ $\Gamma$ 4+F | -2875.34  |
| PA-X    | 61          | HIVb                 | -390.45   |
| HA0     | 566         | HIVw+I+ $\Gamma$ 4   | -6634.43  |
| HA1     | 329         | HIVw+ $\Gamma$ 4     | -4830.01  |
| HA2     | 121         | HIVw+ $\Gamma$ 4     | -1252.39  |
| NP      | 498         | FLU+I+ $\Gamma$ 4+F  | -2614.41  |
| NA      | 469         | HIVw+I+ $\Gamma$ 4+F | -4582.06  |
| M1      | 252         | FLU+I+F              | -912.15   |
| M2      | 97          | HIVb+ $\Gamma$ 4     | -730.40   |
| NS2     | 220         | HIVw+ $\Gamma$ 4     | -1964.02  |
| NS2     | 121         | HIVw+ $\Gamma$ 4+F   | -663.324  |

HIVw, Human immunodeficiency virus within hosts

HIVb, Human immunodeficiency virus between hosts

FLU, Influenza-specific amino acid substitution model

$\Gamma$ 4, Rate heterogeneity gamma distribution of among-site rate variation with four categories estimated from the empirical data

I, Proportion of invariable sites

F, unequal base frequencies

lnL, Log likelihood

**TABLE S3.** To test if the time of circulation of the MRCA of a gene segment (row) is significantly different from the time of circulation of the MRCA of other gene segments (column) of a given antigenic cluster, a Bayes factor test was performed\* (3-7). The time of circulation of MRCAs are significantly different if the Bayes factor values are <0.11 and >9.0 (highlighted in bold).

| Cluster |     | PB1  | PA          | HA            | NP           | NA          | MP            | NS           |
|---------|-----|------|-------------|---------------|--------------|-------------|---------------|--------------|
| HK68    | PB2 | 2.63 | <b>0.02</b> | 2.13          | 0.24         | <b>0.07</b> | 0.36          | 0.69         |
|         | PB1 |      | <b>0</b>    | 0.69          | <b>0.06</b>  | <b>0</b>    | <b>0.10</b>   | 0.18         |
|         | PA  |      |             | > <b>100</b>  | <b>11.07</b> | 5.05        | <b>15.52</b>  | <b>57.71</b> |
|         | HA  |      |             |               | <b>0.08</b>  | <b>0.01</b> | 0.12          | 0.27         |
|         | NP  |      |             |               |              | 0.37        | 1.47          | 3.03         |
|         | NA  |      |             |               |              |             | 4.16          | <b>9.85</b>  |
|         | M   |      |             |               |              |             |               | 1.88         |
| EN72    | PB2 | 0.69 | 0.94        | 0.97          | 0.54         | 0.39        | 0.34          | 0.27         |
|         | PB1 |      | 0.79        | 0.62          | 0.41         | 0.28        | 0.20          | <b>0.11</b>  |
|         | PA  |      |             | 0.53          | 0.30         | 0.14        | <b>0.09</b>   | <b>0.05</b>  |
|         | HA  |      |             |               | 0.26         | 0.11        | <b>0.08</b>   | <b>0.04</b>  |
|         | NP  |      |             |               |              | 0.35        | 0.24          | 0.19         |
|         | NA  |      |             |               |              |             | 0.35          | 0.25         |
|         | M   |      |             |               |              |             |               | 0.48         |
| VI75    | PB2 | 0.79 | <b>0.10</b> | > <b>1000</b> | <b>0.06</b>  | 0.28        | > <b>100</b>  | <b>0.04</b>  |
|         | PB1 |      | 0.13        | > <b>1000</b> | <b>0.07</b>  | 0.41        | > <b>100</b>  | <b>0.03</b>  |
|         | PA  |      |             | > <b>1000</b> | 0.39         | 1.92        | > <b>1000</b> | 0.42         |
|         | HA  |      |             |               | > <b>100</b> | <b>0</b>    | <b>0.08</b>   | <b>0</b>     |
|         | NP  |      |             |               |              | 4.22        | > <b>1000</b> | 1.19         |
|         | NA  |      |             |               |              |             | > <b>100</b>  | 0.20         |
|         | M   |      |             |               |              |             |               | <b>0</b>     |
| TX77    | PB2 | 1.14 | 1.81        | 0.50          | 1.29         | 2.38        | 2.05          | 2.41         |
|         | PB1 |      | 1.69        | 0.63          | 1.27         | 2.81        | 2.02          | 1.98         |
|         | PA  |      |             | 0.26          | 1.22         | 1.50        | 0.99          | 1.38         |
|         | HA  |      |             |               | 1.22         | 4.59        | 5.03          | 4.88         |
|         | NP  |      |             |               |              | 2.20        | 1.45          | 1.80         |
|         | NA  |      |             |               |              |             | 0.61          | 0.78         |
|         | M   |      |             |               |              |             |               | 1.20         |
| BK79    | PB2 | 2.92 | 0.75        | 1.11          | 0.22         | 0.34        | 0.31          | 0.32         |
|         | PB1 |      | 0.22        | 0.11          | <b>0.02</b>  | 0.23        | 0.12          | <b>0.07</b>  |
|         | PA  |      |             | 0.57          | 0.18         | 1.01        | 0.39          | 0.39         |
|         | HA  |      |             |               | <b>0.07</b>  | 0.57        | 0.36          | 0.25         |

|      |     |                 |          |                 |              |                 |              |             |
|------|-----|-----------------|----------|-----------------|--------------|-----------------|--------------|-------------|
|      | NP  |                 |          |                 |              | <b>12.56</b>    | 3.38         | 4.24        |
|      | NA  |                 |          |                 |              |                 | 0.40         | 0.34        |
|      | M   |                 |          |                 |              |                 |              | 1.04        |
| SI87 | PB2 | 1.74            | 1.10     | <b>46.19</b>    | 0.39         | <b>0</b>        | <b>0</b>     | <b>0</b>    |
|      | PB1 |                 | 0.59     | <b>35.42</b>    | 0.21         | <b>0</b>        | <b>0</b>     | <b>0</b>    |
|      | PA  |                 |          | <b>&gt;100</b>  | 0.42         | <b>0</b>        | <b>0</b>     | <b>0</b>    |
|      | HA  |                 |          |                 | <b>0</b>     | <b>0</b>        | <b>0</b>     | <b>0</b>    |
|      | NP  |                 |          |                 |              | <b>0</b>        | <b>0.01</b>  | <b>0</b>    |
|      | NA  |                 |          |                 |              |                 | 1.00         | 0.75        |
|      | M   |                 |          |                 |              |                 |              | 0.83        |
| BE89 | PB2 | 0.86            | 2.82     | 3.61            | 0.44         | 3.19            | 1.26         | 2.35        |
|      | PB1 |                 | 3.35     | 3.62            | 0.52         | 4.60            | 1.56         | 2.33        |
|      | PA  |                 |          | 1.58            | 0.22         | 1.36            | 0.49         | 1.11        |
|      | HA  |                 |          |                 | 0.16         | 0.82            | 0.35         | 0.85        |
|      | NP  |                 |          |                 |              | 7.60            | 2.48         | 3.39        |
|      | NA  |                 |          |                 |              |                 | 0.39         | 0.78        |
|      | M   |                 |          |                 |              |                 |              | 1.76        |
| BE92 | PB2 | 0.85            | 3.67     | <b>&gt;1000</b> | 7.93         | 0.90            | 1.06         | 0.68        |
|      | PB1 |                 | 4.83     | <b>&gt;1000</b> | <b>9.21</b>  | 1.32            | 1.32         | 0.66        |
|      | PA  |                 |          | <b>&gt;1000</b> | 6.32         | 0.31            | 0.32         | 0.27        |
|      | HA  |                 |          |                 | 0.11         | <b>0</b>        | <b>0</b>     | <b>0</b>    |
|      | NP  |                 |          |                 |              | 0.11            | 0.13         | 0.12        |
|      | NA  |                 |          |                 |              |                 | 0.97         | 0.59        |
|      | M   |                 |          |                 |              |                 |              | 0.62        |
| WU95 | PB2 | <b>&gt;1000</b> | 3.67     | <b>&gt;1000</b> | <b>16.23</b> | <b>&gt;1000</b> | 1.07         | 0.68        |
|      | PB1 |                 | <b>0</b> | <b>&gt;100</b>  | <b>0</b>     | 1.67            | <b>0</b>     | <b>0</b>    |
|      | PA  |                 |          | <b>&gt;1000</b> | <b>13.06</b> | <b>&gt;1000</b> | 0.32         | 0.27        |
|      | HA  |                 |          |                 | <b>0</b>     | <b>0.01</b>     | <b>0</b>     | <b>0</b>    |
|      | NP  |                 |          |                 |              | <b>&gt;100</b>  | <b>0.07</b>  | <b>0.06</b> |
|      | NA  |                 |          |                 |              |                 | <b>0</b>     | <b>0</b>    |
|      | M   |                 |          |                 |              |                 |              | 0.62        |
| SY97 | PB2 | 3.35            | 1.20     | 1.01            | <b>0.06</b>  | <b>0</b>        | 1.04         | 0.11        |
|      | PB1 |                 | 0.38     | 0.23            | <b>0.01</b>  | <b>0</b>        | 0.44         | <b>0.03</b> |
|      | PA  |                 |          | 0.89            | <b>0.05</b>  | <b>0</b>        | 0.82         | <b>0.09</b> |
|      | HA  |                 |          |                 | <b>0.05</b>  | <b>0</b>        | 0.91         | <b>0.10</b> |
|      | NP  |                 |          |                 |              | 0.12            | <b>9.93</b>  | 1.15        |
|      | NA  |                 |          |                 |              |                 | <b>78.30</b> | 3.81        |
|      | M   |                 |          |                 |              |                 |              | 0.16        |
| FU02 | PB2 | 0.43            | 0.79     | <b>&gt;1000</b> | <b>0</b>     | 0.30            | <b>0.10</b>  | <b>0.01</b> |
|      | PB1 |                 | 1.75     | <b>&gt;1000</b> | <b>0</b>     | 0.72            | 0.16         | <b>0.01</b> |
|      | PA  |                 |          | <b>&gt;1000</b> | <b>0</b>     | 0.45            | <b>0.10</b>  | <b>0.01</b> |
|      | HA  |                 |          |                 | <b>0</b>     | <b>0</b>        | <b>0</b>     | <b>0</b>    |
|      | NP  |                 |          |                 |              | <b>1021.95</b>  | <b>29.51</b> | 3.20        |

|      |     |          |          |               |             |               |              |              |
|------|-----|----------|----------|---------------|-------------|---------------|--------------|--------------|
|      | NA  |          |          |               |             |               | 0.25         | <b>0.04</b>  |
|      | M   |          |          |               |             |               |              | 0.28         |
| CA04 | PB2 | <b>0</b> | <b>0</b> | 3.59          | <b>0</b>    | 4.41          | <b>0</b>     | 0.73         |
|      | PB1 |          | 0.24     | > <b>1000</b> | 0.68        | > <b>1000</b> | 1.76         | <b>40.66</b> |
|      | PA  |          |          | > <b>1000</b> | 2.75        | > <b>1000</b> | 4.62         | > <b>100</b> |
|      | HA  |          |          |               | <b>0</b>    | 1.45          | <b>0</b>     | 0.32         |
|      | NP  |          |          |               |             | > <b>1000</b> | 2.29         | <b>63.15</b> |
|      | NA  |          |          |               |             |               | <b>0</b>     | 0.25         |
|      | M   |          |          |               |             |               |              | <b>27.52</b> |
| PE09 | PB2 | 6.79     | 5.30     | > <b>1000</b> | 8.89        | <b>24.14</b>  | <b>23.32</b> | 1.04         |
|      | PB1 |          | 1.11     | > <b>100</b>  | 2.17        | 4.76          | 3.98         | 0.23         |
|      | PA  |          |          | > <b>100</b>  | 2.31        | 3.97          | 3.13         | 0.30         |
|      | HA  |          |          |               | <b>0.06</b> | <b>0.05</b>   | <b>0.04</b>  | <b>0</b>     |
|      | NP  |          |          |               |             | 1.59          | 1.38         | 0.17         |
|      | NA  |          |          |               |             |               | 0.82         | <b>0.07</b>  |
|      | M   |          |          |               |             |               |              | <b>0.09</b>  |

\*Bayes factor:  $\frac{P(A>B|D)}{1-P(A>B|D)} \times \frac{1-P(A>B)}{P(A>B)}$

**TABLE S4.** Reassortment events between segments of human (A)H3N2 viruses circulating between 1968 and 2011 analyzed with GiRaF(8). Persistent reassortment events are shown in bold.

| Event <sup>a</sup> | Isolates                                                                                                                                                                                                                                                                                                                                                                                                                                                                                                                                                                                                                                                                                                                                                                                                                                                                                                                                                                                                                                                                                                                                                                                                                                                                                                                                                                                                                                                                                                                                                                                                                                                                                                                                                                                                                                                                                                                                                                                                                                                                                                                                                                                                                                                                                                                                                                                                                                                                                                                                                                                                                                                                                                                           |
|--------------------|------------------------------------------------------------------------------------------------------------------------------------------------------------------------------------------------------------------------------------------------------------------------------------------------------------------------------------------------------------------------------------------------------------------------------------------------------------------------------------------------------------------------------------------------------------------------------------------------------------------------------------------------------------------------------------------------------------------------------------------------------------------------------------------------------------------------------------------------------------------------------------------------------------------------------------------------------------------------------------------------------------------------------------------------------------------------------------------------------------------------------------------------------------------------------------------------------------------------------------------------------------------------------------------------------------------------------------------------------------------------------------------------------------------------------------------------------------------------------------------------------------------------------------------------------------------------------------------------------------------------------------------------------------------------------------------------------------------------------------------------------------------------------------------------------------------------------------------------------------------------------------------------------------------------------------------------------------------------------------------------------------------------------------------------------------------------------------------------------------------------------------------------------------------------------------------------------------------------------------------------------------------------------------------------------------------------------------------------------------------------------------------------------------------------------------------------------------------------------------------------------------------------------------------------------------------------------------------------------------------------------------------------------------------------------------------------------------------------------------|
| 1                  | A/Bilthoven/16190/1968                                                                                                                                                                                                                                                                                                                                                                                                                                                                                                                                                                                                                                                                                                                                                                                                                                                                                                                                                                                                                                                                                                                                                                                                                                                                                                                                                                                                                                                                                                                                                                                                                                                                                                                                                                                                                                                                                                                                                                                                                                                                                                                                                                                                                                                                                                                                                                                                                                                                                                                                                                                                                                                                                                             |
| 2                  | A/Bilthoven/93/1970, A/Bilthoven/2668/1970                                                                                                                                                                                                                                                                                                                                                                                                                                                                                                                                                                                                                                                                                                                                                                                                                                                                                                                                                                                                                                                                                                                                                                                                                                                                                                                                                                                                                                                                                                                                                                                                                                                                                                                                                                                                                                                                                                                                                                                                                                                                                                                                                                                                                                                                                                                                                                                                                                                                                                                                                                                                                                                                                         |
| 3                  | A/Amsterdam/1609/1977, A/Bilthoven/3895/1977, A/Rotterdam/5828/1977, A/Rotterdam/8179/1977                                                                                                                                                                                                                                                                                                                                                                                                                                                                                                                                                                                                                                                                                                                                                                                                                                                                                                                                                                                                                                                                                                                                                                                                                                                                                                                                                                                                                                                                                                                                                                                                                                                                                                                                                                                                                                                                                                                                                                                                                                                                                                                                                                                                                                                                                                                                                                                                                                                                                                                                                                                                                                         |
| 4                  | A/Phillippines/2/1982                                                                                                                                                                                                                                                                                                                                                                                                                                                                                                                                                                                                                                                                                                                                                                                                                                                                                                                                                                                                                                                                                                                                                                                                                                                                                                                                                                                                                                                                                                                                                                                                                                                                                                                                                                                                                                                                                                                                                                                                                                                                                                                                                                                                                                                                                                                                                                                                                                                                                                                                                                                                                                                                                                              |
| 5*                 | A/Akita/4/1993, A/Lyon/672/1993, A/Netherlands/17/1993, A/Netherlands/3/1992, A/Shangdong/9/1993                                                                                                                                                                                                                                                                                                                                                                                                                                                                                                                                                                                                                                                                                                                                                                                                                                                                                                                                                                                                                                                                                                                                                                                                                                                                                                                                                                                                                                                                                                                                                                                                                                                                                                                                                                                                                                                                                                                                                                                                                                                                                                                                                                                                                                                                                                                                                                                                                                                                                                                                                                                                                                   |
| 6                  | A/Yamagata/56/1993                                                                                                                                                                                                                                                                                                                                                                                                                                                                                                                                                                                                                                                                                                                                                                                                                                                                                                                                                                                                                                                                                                                                                                                                                                                                                                                                                                                                                                                                                                                                                                                                                                                                                                                                                                                                                                                                                                                                                                                                                                                                                                                                                                                                                                                                                                                                                                                                                                                                                                                                                                                                                                                                                                                 |
| 7                  | A/Lyon/22686/1993                                                                                                                                                                                                                                                                                                                                                                                                                                                                                                                                                                                                                                                                                                                                                                                                                                                                                                                                                                                                                                                                                                                                                                                                                                                                                                                                                                                                                                                                                                                                                                                                                                                                                                                                                                                                                                                                                                                                                                                                                                                                                                                                                                                                                                                                                                                                                                                                                                                                                                                                                                                                                                                                                                                  |
| 8                  | A/Shangdong/9/1993                                                                                                                                                                                                                                                                                                                                                                                                                                                                                                                                                                                                                                                                                                                                                                                                                                                                                                                                                                                                                                                                                                                                                                                                                                                                                                                                                                                                                                                                                                                                                                                                                                                                                                                                                                                                                                                                                                                                                                                                                                                                                                                                                                                                                                                                                                                                                                                                                                                                                                                                                                                                                                                                                                                 |
| 9                  | A/Akita/4/1993, A/Lyon/672/1993, A/Madrid/G102/1993, A/Madrid/G130/1993, A/Netherlands/101/1993, A/Netherlands/115/1993, A/Netherlands/126/1993, A/Shangdong/9/1993, A/Singapore/3/1993                                                                                                                                                                                                                                                                                                                                                                                                                                                                                                                                                                                                                                                                                                                                                                                                                                                                                                                                                                                                                                                                                                                                                                                                                                                                                                                                                                                                                                                                                                                                                                                                                                                                                                                                                                                                                                                                                                                                                                                                                                                                                                                                                                                                                                                                                                                                                                                                                                                                                                                                            |
| 10                 | A/Hong Kong/1/1994, A/Hong Kong/42/1996, A/Hong Kong/434/1996, A/Hong Kong/55/1994, A/Johannesburg/33/1994, A/Johannesburg/47/1994, A/Netherlands/1/1995                                                                                                                                                                                                                                                                                                                                                                                                                                                                                                                                                                                                                                                                                                                                                                                                                                                                                                                                                                                                                                                                                                                                                                                                                                                                                                                                                                                                                                                                                                                                                                                                                                                                                                                                                                                                                                                                                                                                                                                                                                                                                                                                                                                                                                                                                                                                                                                                                                                                                                                                                                           |
| 11*                | A/Hong Kong/1/1994, A/Hong Kong/434/1996, A/Hong Kong/55/1994, A/Johannesburg/33/1994, A/Johannesburg/47/1994                                                                                                                                                                                                                                                                                                                                                                                                                                                                                                                                                                                                                                                                                                                                                                                                                                                                                                                                                                                                                                                                                                                                                                                                                                                                                                                                                                                                                                                                                                                                                                                                                                                                                                                                                                                                                                                                                                                                                                                                                                                                                                                                                                                                                                                                                                                                                                                                                                                                                                                                                                                                                      |
| 12                 | A/Hong Kong/55/1995                                                                                                                                                                                                                                                                                                                                                                                                                                                                                                                                                                                                                                                                                                                                                                                                                                                                                                                                                                                                                                                                                                                                                                                                                                                                                                                                                                                                                                                                                                                                                                                                                                                                                                                                                                                                                                                                                                                                                                                                                                                                                                                                                                                                                                                                                                                                                                                                                                                                                                                                                                                                                                                                                                                |
| 13                 | A/Netherlands/1/1995                                                                                                                                                                                                                                                                                                                                                                                                                                                                                                                                                                                                                                                                                                                                                                                                                                                                                                                                                                                                                                                                                                                                                                                                                                                                                                                                                                                                                                                                                                                                                                                                                                                                                                                                                                                                                                                                                                                                                                                                                                                                                                                                                                                                                                                                                                                                                                                                                                                                                                                                                                                                                                                                                                               |
| 14*                | A/Hong Kong/42/1996                                                                                                                                                                                                                                                                                                                                                                                                                                                                                                                                                                                                                                                                                                                                                                                                                                                                                                                                                                                                                                                                                                                                                                                                                                                                                                                                                                                                                                                                                                                                                                                                                                                                                                                                                                                                                                                                                                                                                                                                                                                                                                                                                                                                                                                                                                                                                                                                                                                                                                                                                                                                                                                                                                                |
| 15*                | <b>A/Akita/4/1993, A/Auckland/10/1997, A/Brisbane/10/2007, A/Brisbane/8/1996, A/California/7/2004, A/England/7/1994, A/Finland/247/1992, A/Finland/338/1995, A/Finland/339/1995, A/Finland/381/1995, A/Fujian/411/2002, A/Geneva/3958/1996, A/Geneva/A9509/1995, A/Guangdong/25/1993, A/Hiroshima/52/2005, A/Hong Kong/1/1994, A/Hong Kong/1/1997, A/Hong Kong/2/1994, A/Hong Kong/20/1996, A/Hong Kong/280/1997, A/Hong Kong/3/1995, A/Hong Kong/32/1995, A/Hong Kong/357/1996, A/Hong Kong/358/1996, A/Hong Kong/38/1995, A/Hong Kong/42/1996, A/Hong Kong/434/1996, A/Hong Kong/49/1995, A/Hong Kong/55/1994, A/Hong Kong/55/1995, A/Hong Kong/56/1994, A/Johannesburg/10/1997, A/Johannesburg/33/1994, A/Johannesburg/47/1994, A/Lyon/1781/1996, A/Lyon/1803/1993, A/Lyon/1815/1993, A/Lyon/22686/1993, A/Lyon/2279/1995, A/Lyon/23602/1993, A/Lyon/672/1993, A/Madrid/G102/1993, A/Madrid/G109/1993, A/Madrid/G122/1993, A/Madrid/G130/1993, A/Madrid/G252/1993, A/Moscow/10/1999, A/Nanchang/933/1995, A/Netherlands/1/1995, A/Netherlands/1/2002, A/Netherlands/101/1993, A/Netherlands/115/1993, A/Netherlands/118/2001, A/Netherlands/120/2002, A/Netherlands/124/2001, A/Netherlands/126/1993, A/Netherlands/126/2001, A/Netherlands/132/2004, A/Netherlands/17/1993, A/Netherlands/178/1995, A/Netherlands/179/1993, A/Netherlands/18/1994, A/Netherlands/20/2003, A/Netherlands/213/2003, A/Netherlands/217/2003, A/Netherlands/22/2003, A/Netherlands/222/2003, A/Netherlands/241/1993, A/Netherlands/271/1995, A/Netherlands/3/1992, A/Netherlands/3/2000, A/Netherlands/300/1997, A/Netherlands/301/1999, A/Netherlands/312/2003, A/Netherlands/34/2010, A/Netherlands/348/2007, A/Netherlands/357/1993, A/Netherlands/363/2006, A/Netherlands/371/1993, A/Netherlands/372/1993, A/Netherlands/377/2008, A/Netherlands/398/1993, A/Netherlands/399/1993, A/Netherlands/414/1999, A/Netherlands/42/2006, A/Netherlands/427/1998, A/Netherlands/462/1998, A/Netherlands/5/1998, A/Netherlands/548/2008, A/Netherlands/55/2004, A/Netherlands/63/2011, A/Netherlands/69/2007, A/Netherlands/69/2009, A/Netherlands/761/2009, A/Netherlands/88/2003, A/Netherlands/9/2010, A/Netherlands/91/1996, A/Nice/491/1997, A/Oslo/21/1997, A/Oslo/2219/1993, A/Oslo/2352/1993, A/Oslo/244/1997, A/Panama/2007/1999, A/Perth/16/2009, A/Scotland/142/1993, A/Scotland/160/1993, A/Shangdong/9/1993, A/Singapore/1/1996, A/Singapore/19/1993, A/Singapore/3/1993, A/South Australia/15/1994, A/South Australia/25/1994, A/Stockholm/20/1993, A/Stockholm/5/1995, A/Sydney/5/1997, A/Victoria/104/1993, A/Victoria/75/1995, A/Wellington/1/2004, A/Wellington/59/1993, A/Wisconsin/67/2005, A/Wuhan/359/1995, A/Wyoming/3/2003</b> |
| 16*                | <b>A/Akita/4/1993, A/Auckland/10/1997, A/Brisbane/10/2007, A/Brisbane/8/1996, A/California/7/2004, A/Finland/247/1992, A/Finland/338/1995, A/Finland/339/1995, A/Finland/381/1995, A/Fujian/411/2002, A/Geneva/3958/1996, A/Geneva/A9509/1995, A/Guangdong/25/1993, A/Hiroshima/52/2005, A/Hong Kong/1/1994, A/Hong Kong/1/1997, A/Hong Kong/2/1994, A/Hong</b>                                                                                                                                                                                                                                                                                                                                                                                                                                                                                                                                                                                                                                                                                                                                                                                                                                                                                                                                                                                                                                                                                                                                                                                                                                                                                                                                                                                                                                                                                                                                                                                                                                                                                                                                                                                                                                                                                                                                                                                                                                                                                                                                                                                                                                                                                                                                                                    |

|     |                                                                                                                                                                                                                                                                                                                                                                                                                                                                                                                                                                                                                                                                                                                                                                                                                                                                                                                                                                                                                                                                                                                                                                                                                                                                                                                                                                                                                                                                                                                                                                                                                                                                                                                                                                                                                                                                                                                                                                             |
|-----|-----------------------------------------------------------------------------------------------------------------------------------------------------------------------------------------------------------------------------------------------------------------------------------------------------------------------------------------------------------------------------------------------------------------------------------------------------------------------------------------------------------------------------------------------------------------------------------------------------------------------------------------------------------------------------------------------------------------------------------------------------------------------------------------------------------------------------------------------------------------------------------------------------------------------------------------------------------------------------------------------------------------------------------------------------------------------------------------------------------------------------------------------------------------------------------------------------------------------------------------------------------------------------------------------------------------------------------------------------------------------------------------------------------------------------------------------------------------------------------------------------------------------------------------------------------------------------------------------------------------------------------------------------------------------------------------------------------------------------------------------------------------------------------------------------------------------------------------------------------------------------------------------------------------------------------------------------------------------------|
|     | <p>Kong/20/1996, A/Hong Kong/280/1997, A/Hong Kong/3/1995, A/Hong Kong/32/1995, A/Hong Kong/357/1996, A/Hong Kong/358/1996, A/Hong Kong/38/1995, A/Hong Kong/42/1996, A/Hong Kong/434/1996, A/Hong Kong/49/1995, A/Hong Kong/55/1994, A/Hong Kong/55/1995, A/Hong Kong/56/1994, A/Johannesburg/10/1997, A/Johannesburg/33/1994, A/Johannesburg/47/1994, A/Lyon/1781/1996, A/Lyon/2279/1995, A/Lyon/672/1993, A/Madrid/G102/1993, A/Madrid/G109/1993, A/Madrid/G122/1993, A/Madrid/G130/1993, A/Madrid/G252/1993, A/Moscow/10/1999, A/Nanchang/933/1995, A/Netherlands/1/1995, A/Netherlands/1/2002, A/Netherlands/101/1993, A/Netherlands/115/1993, A/Netherlands/118/2001, A/Netherlands/120/2002, A/Netherlands/124/2001, A/Netherlands/126/1993, A/Netherlands/126/2001, A/Netherlands/132/2004, A/Netherlands/17/1993, A/Netherlands/178/1995, A/Netherlands/179/1993, A/Netherlands/20/2003, A/Netherlands/213/2003, A/Netherlands/217/2003, A/Netherlands/22/2003, A/Netherlands/222/2003, A/Netherlands/271/1995, A/Netherlands/3/1992, A/Netherlands/3/2000, A/Netherlands/300/1997, A/Netherlands/301/1999, A/Netherlands/312/2003, A/Netherlands/34/2010, A/Netherlands/348/2007, A/Netherlands/363/2006, A/Netherlands/377/2008, A/Netherlands/414/1999, A/Netherlands/42/2006, A/Netherlands/427/1998, A/Netherlands/462/1998, A/Netherlands/5/1998, A/Netherlands/548/2008, A/Netherlands/55/2004, A/Netherlands/63/2011, A/Netherlands/69/2007, A/Netherlands/69/2009, A/Netherlands/761/2009, A/Netherlands/88/2003, A/Netherlands/9/2010, A/Netherlands/91/1996, A/Nice/491/1997, A/Oslo/21/1997, A/Oslo/2219/1993, A/Oslo/244/1997, A/Panama/2007/1999, A/Perth/16/2009, A/Shangdong/9/1993, A/Singapore/1/1996, A/Singapore/3/1993, A/South Australia/15/1994, A/South Australia/25/1994, A/Stockholm/5/1995, A/Sydney/5/1997, A/Victoria/75/1995, A/Wellington/1/2004, A/Wellington/59/1993, A/Wisconsin/67/2005, A/Wuhan/359/1995, A/Wyoming/3/2003</p> |
| 17  | <p>A/Auckland/10/1997, A/Brisbane/10/2007, A/Brisbane/8/1996, A/California/7/2004, A/England/7/1994, A/Fujian/411/2002, A/Hiroshima/52/2005, A/Hong Kong/280/1997, A/Hong Kong/357/1996, A/Hong Kong/358/1996, A/Hong Kong/42/1996, A/Lyon/1803/1993, A/Lyon/1815/1993, A/Lyon/22686/1993, A/Lyon/2279/1995, A/Lyon/23602/1993, A/Moscow/10/1999, A/Netherlands/1/2002, A/Netherlands/118/2001, A/Netherlands/120/2002, A/Netherlands/124/2001, A/Netherlands/126/2001, A/Netherlands/132/2004, A/Netherlands/18/1994, A/Netherlands/20/2003, A/Netherlands/213/2003, A/Netherlands/217/2003, A/Netherlands/22/2003, A/Netherlands/222/2003, A/Netherlands/241/1993, A/Netherlands/3/2000, A/Netherlands/300/1997, A/Netherlands/301/1999, A/Netherlands/312/2003, A/Netherlands/34/2010, A/Netherlands/348/2007, A/Netherlands/357/1993, A/Netherlands/363/2006, A/Netherlands/371/1993, A/Netherlands/372/1993, A/Netherlands/377/2008, A/Netherlands/398/1993, A/Netherlands/399/1993, A/Netherlands/414/1999, A/Netherlands/42/2006, A/Netherlands/427/1998, A/Netherlands/462/1998, A/Netherlands/5/1998, A/Netherlands/548/2008, A/Netherlands/55/2004, A/Netherlands/63/2011, A/Netherlands/69/2007, A/Netherlands/69/2009, A/Netherlands/761/2009, A/Netherlands/88/2003, A/Netherlands/9/2010, A/Oslo/2352/1993, A/Panama/2007/1999, A/Perth/16/2009, A/Scotland/142/1993, A/Scotland/160/1993, A/Stockholm/20/1993, A/Sydney/5/1997, A/Victoria/104/1993, A/Wellington/1/2004, A/Wisconsin/67/2005, A/Wyoming/3/2003</p>                                                                                                                                                                                                                                                                                                                                                                                                                                          |
| 18* | <p>A/Auckland/10/1997, A/Brisbane/10/2007, A/Brisbane/8/1996, A/California/7/2004, A/Finland/381/1995, A/Fujian/411/2002, A/Geneva/3958/1996, A/Hiroshima/52/2005, A/Hong Kong/1/1994, A/Hong Kong/1/1997, A/Hong Kong/280/1997, A/Hong Kong/357/1996, A/Hong Kong/358/1996, A/Hong Kong/42/1996, A/Hong Kong/434/1996, A/Hong Kong/55/1994, A/Johannesburg/10/1997, A/Johannesburg/33/1994, A/Johannesburg/47/1994, A/Lyon/1781/1996, A/Lyon/2279/1995, A/Moscow/10/1999, A/Netherlands/1/1995, A/Netherlands/1/2002, A/Netherlands/118/2001, A/Netherlands/120/2002, A/Netherlands/124/2001, A/Netherlands/126/2001, A/Netherlands/132/2004, A/Netherlands/20/2003, A/Netherlands/213/2003, A/Netherlands/217/2003, A/Netherlands/22/2003, A/Netherlands/222/2003, A/Netherlands/271/1995, A/Netherlands/3/2000, A/Netherlands/300/1997, A/Netherlands/301/1999, A/Netherlands/312/2003, A/Netherlands/34/2010, A/Netherlands/348/2007, A/Netherlands/363/2006, A/Netherlands/377/2008, A/Netherlands/414/1999, A/Netherlands/42/2006, A/Netherlands/427/1998, A/Netherlands/462/1998, A/Netherlands/5/1998, A/Netherlands/548/2008, A/Netherlands/55/2004, A/Netherlands/63/2011, A/Netherlands/69/2007, A/Netherlands/69/2009, A/Netherlands/761/2009, A/Netherlands/88/2003, A/Netherlands/9/2010, A/Netherlands/91/1996, A/Nice/491/1997, A/Oslo/21/1997, A/Oslo/244/1997, A/Panama/2007/1999, A/Perth/16/2009, A/Singapore/1/1996, A/South Australia/15/1994, A/South Australia/25/1994, A/Sydney/5/1997, A/Victoria/75/1995, A/Wellington/1/2004, A/Wisconsin/67/2005, A/Wyoming/3/2003</p>                                                                                                                                                                                                                                                                                                                                                                         |
| 19  | <p>A/Akita/4/1993, A/Finland/247/1992, A/Finland/338/1995, A/Finland/339/1995, A/Finland/381/1995, A/Geneva/3958/1996, A/Geneva/A9509/1995, A/Guangdong/25/1993, A/Hong Kong/1/1997, A/Hong Kong/2/1994, A/Hong Kong/20/1996, A/Hong Kong/3/1995, A/Hong Kong/32/1995, A/Hong Kong/38/1995, A/Hong Kong/49/1995, A/Hong Kong/55/1995, A/Hong Kong/56/1994, A/Johannesburg/10/1997, A/Lyon/1781/1996, A/Lyon/672/1993, A/Madrid/G102/1993, A/Madrid/G109/1993, A/Madrid/G122/1993, A/Madrid/G130/1993, A/Madrid/G252/1993, A/Nanchang/933/1995, A/Netherlands/101/1993, A/Netherlands/115/1993, A/Netherlands/126/1993, A/Netherlands/17/1993, A/Netherlands/178/1995, A/Netherlands/179/1993, A/Netherlands/271/1995,</p>                                                                                                                                                                                                                                                                                                                                                                                                                                                                                                                                                                                                                                                                                                                                                                                                                                                                                                                                                                                                                                                                                                                                                                                                                                                   |



|     |                                                                                                                                                                                                                                                                                                                                                                                                                                                                                                                                                                                                                                                       |
|-----|-------------------------------------------------------------------------------------------------------------------------------------------------------------------------------------------------------------------------------------------------------------------------------------------------------------------------------------------------------------------------------------------------------------------------------------------------------------------------------------------------------------------------------------------------------------------------------------------------------------------------------------------------------|
|     | A/Netherlands/3/1992, A/Netherlands/91/1996, A/Nice/491/1997, A/Oslo/21/1997, A/Oslo/2219/1993, A/Oslo/244/1997, A/Shangdong/9/1993, A/Singapore/1/1996, A/Singapore/19/1993, A/Singapore/3/1993, A/South Australia/15/1994, A/South Australia/25/1994, A/Stockholm/5/1995, A/Victoria/75/1995, A/Wellington/59/1993, A/Wuhan/359/1995                                                                                                                                                                                                                                                                                                                |
| 20* | A/Lyon/1803/1993, A/Netherlands/357/1993, A/Netherlands/399/1993, A/Oslo/2352/1993, A/Scotland/142/1993, A/Victoria/104/1993                                                                                                                                                                                                                                                                                                                                                                                                                                                                                                                          |
| 21* | A/Netherlands/357/1993, A/Netherlands/399/1993, A/Scotland/142/1993, A/Victoria/104/1993                                                                                                                                                                                                                                                                                                                                                                                                                                                                                                                                                              |
| 22* | A/England/7/1994, A/Lyon/1803/1993, A/Lyon/1815/1993, A/Lyon/22686/1993, A/Lyon/23602/1993, A/Netherlands/18/1994, A/Netherlands/241/1993, A/Netherlands/357/1993, A/Netherlands/371/1993, A/Netherlands/372/1993, A/Netherlands/398/1993, A/Netherlands/399/1993, A/Oslo/2352/1993, A/Scotland/142/1993, A/Scotland/160/1993, A/Stockholm/20/1993, A/Victoria/104/1993                                                                                                                                                                                                                                                                               |
| 23* | A/England/7/1994, A/Lyon/1815/1993, A/Lyon/22686/1993, A/Lyon/23602/1993, A/Netherlands/18/1994, A/Netherlands/241/1993, A/Netherlands/371/1993, A/Netherlands/372/1993, A/Netherlands/398/1993, A/Scotland/160/1993, A/Singapore/19/1993, A/Stockholm/20/1993                                                                                                                                                                                                                                                                                                                                                                                        |
| 24* | A/England/7/1994, A/Lyon/1815/1993, A/Lyon/22686/1993, A/Lyon/23602/1993, A/Netherlands/18/1994, A/Netherlands/241/1993, A/Netherlands/371/1993, A/Netherlands/372/1993, A/Netherlands/398/1993, A/Scotland/160/1993, A/Singapore/19/1993                                                                                                                                                                                                                                                                                                                                                                                                             |
| 25  | A/England/7/1994, A/Lyon/1815/1993, A/Lyon/22686/1993, A/Lyon/23602/1993, A/Netherlands/18/1994, A/Netherlands/241/1993, A/Netherlands/371/1993, A/Netherlands/372/1993, A/Netherlands/398/1993, A/Scotland/160/1993                                                                                                                                                                                                                                                                                                                                                                                                                                  |
| 26  | A/Akita/4/1993, A/Finland/338/1995, A/Finland/339/1995, A/Geneva/A9509/1995, A/Guangdong/25/1993, A/Hong Kong/2/1994, A/Hong Kong/20/1996, A/Hong Kong/3/1995, A/Hong Kong/32/1995, A/Hong Kong/38/1995, A/Hong Kong/49/1995, A/Hong Kong/55/1995, A/Hong Kong/56/1994, A/Lyon/672/1993, A/Madrid/G109/1993, A/Madrid/G122/1993, A/Madrid/G252/1993, A/Nanchang/933/1995, A/Netherlands/115/1993, A/Netherlands/126/1993, A/Netherlands/178/1995, A/Netherlands/179/1993, A/Oslo/2219/1993, A/Shangdong/9/1993, A/Stockholm/5/1995, A/Wellington/59/1993, A/Wuhan/359/1995                                                                            |
| 27  | A/Finland/338/1995, A/Finland/339/1995, A/Geneva/A9509/1995, A/Guangdong/25/1993, A/Hong Kong/2/1994, A/Hong Kong/20/1996, A/Hong Kong/3/1995, A/Hong Kong/32/1995, A/Hong Kong/38/1995, A/Hong Kong/49/1995, A/Hong Kong/55/1995, A/Hong Kong/56/1994, A/Madrid/G109/1993, A/Madrid/G122/1993, A/Madrid/G252/1993, A/Nanchang/933/1995, A/Netherlands/178/1995, A/Netherlands/179/1993, A/Oslo/2219/1993, A/Stockholm/5/1995, A/Wellington/59/1993, A/Wuhan/359/1995                                                                                                                                                                                 |
| 28  | A/England/7/1994, A/Finland/381/1995, A/Lyon/1815/1993, A/Lyon/22686/1993, A/Lyon/23602/1993, A/Netherlands/1/1995, A/Netherlands/18/1994, A/Netherlands/241/1993, A/Netherlands/271/1995, A/Netherlands/371/1993, A/Netherlands/372/1993, A/Netherlands/398/1993, A/Netherlands/91/1996, A/Scotland/160/1993, A/Victoria/75/1995                                                                                                                                                                                                                                                                                                                     |
| 29* | A/Akita/4/1993, A/Brisbane/8/1996, A/Finland/381/1995, A/Geneva/3958/1996, A/Hong Kong/1/1994, A/Hong Kong/42/1996, A/Hong Kong/434/1996, A/Hong Kong/55/1994, A/Johannesburg/33/1994, A/Johannesburg/47/1994, A/Lyon/1781/1996, A/Lyon/1803/1993, A/Lyon/2279/1995, A/Lyon/672/1993, A/Netherlands/1/1995, A/Netherlands/17/1993, A/Netherlands/271/1995, A/Netherlands/3/1992, A/Netherlands/357/1993, A/Netherlands/399/1993, A/Netherlands/91/1996, A/Nice/491/1997, A/Oslo/2352/1993, A/Scotland/142/1993, A/Shangdong/9/1993, A/Singapore/1/1996, A/South Australia/15/1994, A/South Australia/25/1994, A/Victoria/104/1993, A/Victoria/75/1995 |
| 30* | A/Akita/4/1993, A/Brisbane/8/1996, A/Geneva/3958/1996, A/Hong Kong/42/1996, A/Lyon/1781/1996, A/Lyon/1803/1993, A/Lyon/2279/1995, A/Lyon/672/1993, A/Netherlands/17/1993, A/Netherlands/3/1992, A/Netherlands/357/1993, A/Netherlands/399/1993, A/Nice/491/1997, A/Oslo/2352/1993, A/Scotland/142/1993, A/Shangdong/9/1993, A/Singapore/1/1996, A/Victoria/104/1993                                                                                                                                                                                                                                                                                   |
| 31  | A/Brisbane/8/1996, A/Finland/381/1995, A/Geneva/3958/1996, A/Hong Kong/1/1994, A/Hong Kong/42/1996, A/Hong Kong/434/1996, A/Hong Kong/55/1994, A/Johannesburg/33/1994, A/Johannesburg/47/1994, A/Lyon/1781/1996, A/Lyon/2279/1995, A/Netherlands/1/1995, A/Netherlands/271/1995, A/Netherlands/91/1996, A/Nice/491/1997, A/Singapore/1/1996, A/South Australia/15/1994, A/South Australia/25/1994, A/Victoria/75/1995                                                                                                                                                                                                                                 |
| 32* | A/Finland/381/1995, A/Netherlands/1/1995, A/Netherlands/271/1995, A/Netherlands/91/1996, A/Victoria/75/1995                                                                                                                                                                                                                                                                                                                                                                                                                                                                                                                                           |
| 33* | A/Finland/381/1995, A/Netherlands/271/1995, A/Netherlands/91/1996, A/Victoria/75/1995                                                                                                                                                                                                                                                                                                                                                                                                                                                                                                                                                                 |
| 34* | A/Brisbane/8/1996, A/Geneva/3958/1996, A/Hong Kong/42/1996, A/Lyon/1781/1996, A/Lyon/2279/1995, A/Nice/491/1997, A/Singapore/1/1996                                                                                                                                                                                                                                                                                                                                                                                                                                                                                                                   |
| 35  | A/Singapore/19/1993                                                                                                                                                                                                                                                                                                                                                                                                                                                                                                                                                                                                                                   |
| 36  | A/Lyon/2279/1995                                                                                                                                                                                                                                                                                                                                                                                                                                                                                                                                                                                                                                      |
| 37* | A/Hong Kong/20/1996, A/Nanchang/933/1995, A/Wuhan/359/1995                                                                                                                                                                                                                                                                                                                                                                                                                                                                                                                                                                                            |
| 38  | A/Brisbane/8/1996                                                                                                                                                                                                                                                                                                                                                                                                                                                                                                                                                                                                                                     |

|     |                                                                                                                                                                                                                                                                                                                                                                                                                                                                                                                                                                                                                                                                                                                                                                                                                                                                                                                                                                                                                                                                                                                                                                                       |
|-----|---------------------------------------------------------------------------------------------------------------------------------------------------------------------------------------------------------------------------------------------------------------------------------------------------------------------------------------------------------------------------------------------------------------------------------------------------------------------------------------------------------------------------------------------------------------------------------------------------------------------------------------------------------------------------------------------------------------------------------------------------------------------------------------------------------------------------------------------------------------------------------------------------------------------------------------------------------------------------------------------------------------------------------------------------------------------------------------------------------------------------------------------------------------------------------------|
| 39  | A/Hong Kong/20/1996                                                                                                                                                                                                                                                                                                                                                                                                                                                                                                                                                                                                                                                                                                                                                                                                                                                                                                                                                                                                                                                                                                                                                                   |
| 40* | A/Geneva/3958/1996, A/Lyon/1781/1996, A/Nice/491/1997, A/Singapore/1/1996                                                                                                                                                                                                                                                                                                                                                                                                                                                                                                                                                                                                                                                                                                                                                                                                                                                                                                                                                                                                                                                                                                             |
| 41* | A/Lyon/1781/1996, A/Nice/491/1997                                                                                                                                                                                                                                                                                                                                                                                                                                                                                                                                                                                                                                                                                                                                                                                                                                                                                                                                                                                                                                                                                                                                                     |
| 42* | A/Hong Kong/280/1997                                                                                                                                                                                                                                                                                                                                                                                                                                                                                                                                                                                                                                                                                                                                                                                                                                                                                                                                                                                                                                                                                                                                                                  |
| 43* | A/Hong Kong/1/1997, A/Hong Kong/280/1997, A/Johannesburg/10/1997, A/Oslo/21/1997, A/Oslo/244/1997                                                                                                                                                                                                                                                                                                                                                                                                                                                                                                                                                                                                                                                                                                                                                                                                                                                                                                                                                                                                                                                                                     |
| 44* | A/Hong Kong/1/1997, A/Johannesburg/10/1997, A/Oslo/21/1997, A/Oslo/244/1997                                                                                                                                                                                                                                                                                                                                                                                                                                                                                                                                                                                                                                                                                                                                                                                                                                                                                                                                                                                                                                                                                                           |
| 45  | A/Hong Kong/1/1997, A/Hong Kong/280/1997, A/Johannesburg/10/1997, A/Netherlands/5/1998, A/Oslo/21/1997, A/Oslo/244/1997                                                                                                                                                                                                                                                                                                                                                                                                                                                                                                                                                                                                                                                                                                                                                                                                                                                                                                                                                                                                                                                               |
| 46* | A/Hong Kong/280/1997, A/Netherlands/5/1998                                                                                                                                                                                                                                                                                                                                                                                                                                                                                                                                                                                                                                                                                                                                                                                                                                                                                                                                                                                                                                                                                                                                            |
| 47* | A/Netherlands/5/1998                                                                                                                                                                                                                                                                                                                                                                                                                                                                                                                                                                                                                                                                                                                                                                                                                                                                                                                                                                                                                                                                                                                                                                  |
| 48  | A/Auckland/10/1997, A/Brisbane/10/2007, A/Brisbane/8/1996, A/California/7/2004, A/Fujian/411/2002, A/Hiroshima/52/2005, A/Hong Kong/280/1997, A/Hong Kong/357/1996, A/Hong Kong/358/1996, A/Hong Kong/42/1996, A/Lyon/2279/1995, A/Moscow/10/1999, A/Netherlands/1/2002, A/Netherlands/118/2001, A/Netherlands/120/2002, A/Netherlands/124/2001, A/Netherlands/126/2001, A/Netherlands/132/2004, A/Netherlands/20/2003, A/Netherlands/213/2003, A/Netherlands/217/2003, A/Netherlands/22/2003, A/Netherlands/222/2003, A/Netherlands/3/2000, A/Netherlands/300/1997, A/Netherlands/301/1999, A/Netherlands/312/2003, A/Netherlands/34/2010, A/Netherlands/348/2007, A/Netherlands/363/2006, A/Netherlands/377/2008, A/Netherlands/414/1999, A/Netherlands/42/2006, A/Netherlands/427/1998, A/Netherlands/462/1998, A/Netherlands/5/1998, A/Netherlands/548/2008, A/Netherlands/55/2004, A/Netherlands/63/2011, A/Netherlands/69/2007, A/Netherlands/69/2009, A/Netherlands/761/2009, A/Netherlands/88/2003, A/Netherlands/9/2010, A/Panama/2007/1999, A/Perth/16/2009, A/Sydney/5/1997, A/Wellington/1/2004, A/Wisconsin/67/2005, A/Wyoming/3/2003                                    |
| 49  | A/Auckland/10/1997, A/Brisbane/10/2007, A/Brisbane/8/1996, A/California/7/2004, A/Hiroshima/52/2005, A/Hong Kong/357/1996, A/Hong Kong/358/1996, A/Moscow/10/1999, A/Netherlands/1/2002, A/Netherlands/118/2001, A/Netherlands/120/2002, A/Netherlands/124/2001, A/Netherlands/126/2001, A/Netherlands/132/2004, A/Netherlands/20/2003, A/Netherlands/213/2003, A/Netherlands/217/2003, A/Netherlands/22/2003, A/Netherlands/222/2003, A/Netherlands/3/2000, A/Netherlands/300/1997, A/Netherlands/301/1999, A/Netherlands/312/2003, A/Netherlands/34/2010, A/Netherlands/348/2007, A/Netherlands/363/2006, A/Netherlands/377/2008, A/Netherlands/414/1999, A/Netherlands/42/2006, A/Netherlands/427/1998, A/Netherlands/462/1998, A/Netherlands/548/2008, A/Netherlands/55/2004, A/Netherlands/63/2011, A/Netherlands/69/2007, A/Netherlands/69/2009, A/Netherlands/761/2009, A/Netherlands/88/2003, A/Netherlands/9/2010, A/Panama/2007/1999, A/Perth/16/2009, A/Sydney/5/1997, A/Wellington/1/2004, A/Wisconsin/67/2005, A/Wyoming/3/2003                                                                                                                                          |
| 50  | A/Auckland/10/1997, A/Brisbane/10/2007, A/Brisbane/8/1996, A/California/7/2004, A/Fujian/411/2002, A/Geneva/3958/1996, A/Hiroshima/52/2005, A/Hong Kong/357/1996, A/Hong Kong/358/1996, A/Hong Kong/42/1996, A/Lyon/1781/1996, A/Moscow/10/1999, A/Netherlands/1/2002, A/Netherlands/118/2001, A/Netherlands/120/2002, A/Netherlands/124/2001, A/Netherlands/126/2001, A/Netherlands/132/2004, A/Netherlands/20/2003, A/Netherlands/213/2003, A/Netherlands/217/2003, A/Netherlands/22/2003, A/Netherlands/222/2003, A/Netherlands/3/2000, A/Netherlands/300/1997, A/Netherlands/301/1999, A/Netherlands/312/2003, A/Netherlands/34/2010, A/Netherlands/348/2007, A/Netherlands/363/2006, A/Netherlands/377/2008, A/Netherlands/414/1999, A/Netherlands/42/2006, A/Netherlands/427/1998, A/Netherlands/462/1998, A/Netherlands/5/1998, A/Netherlands/548/2008, A/Netherlands/55/2004, A/Netherlands/63/2011, A/Netherlands/69/2007, A/Netherlands/69/2009, A/Netherlands/761/2009, A/Netherlands/88/2003, A/Netherlands/9/2010, A/Nice/491/1997, A/Panama/2007/1999, A/Perth/16/2009, A/Singapore/1/1996, A/Sydney/5/1997, A/Wellington/1/2004, A/Wisconsin/67/2005, A/Wyoming/3/2003 |
| 51* | A/Netherlands/301/1999, A/Panama/2007/1999                                                                                                                                                                                                                                                                                                                                                                                                                                                                                                                                                                                                                                                                                                                                                                                                                                                                                                                                                                                                                                                                                                                                            |
| 52  | A/Netherlands/126/2001                                                                                                                                                                                                                                                                                                                                                                                                                                                                                                                                                                                                                                                                                                                                                                                                                                                                                                                                                                                                                                                                                                                                                                |
| 53  | A/Netherlands/124/2001, A/Netherlands/3/2000                                                                                                                                                                                                                                                                                                                                                                                                                                                                                                                                                                                                                                                                                                                                                                                                                                                                                                                                                                                                                                                                                                                                          |
| 54* | A/Netherlands/312/2003                                                                                                                                                                                                                                                                                                                                                                                                                                                                                                                                                                                                                                                                                                                                                                                                                                                                                                                                                                                                                                                                                                                                                                |
| 55* | A/Brisbane/10/2007, A/California/7/2004, A/Fujian/411/2002, A/Hiroshima/52/2005, A/Netherlands/132/2004, A/Netherlands/213/2003, A/Netherlands/217/2003, A/Netherlands/22/2003, A/Netherlands/34/2010, A/Netherlands/348/2007, A/Netherlands/363/2006, A/Netherlands/377/2008, A/Netherlands/42/2006, A/Netherlands/548/2008, A/Netherlands/55/2004, A/Netherlands/63/2011, A/Netherlands/69/2007, A/Netherlands/69/2009, A/Netherlands/761/2009, A/Netherlands/9/2010, A/Perth/16/2009, A/Wellington/1/2004, A/Wisconsin/67/2005, A/Wyoming/3/2003                                                                                                                                                                                                                                                                                                                                                                                                                                                                                                                                                                                                                                   |
| 56  | A/Hiroshima/52/2005, A/Netherlands/548/2008, A/Wisconsin/67/2005                                                                                                                                                                                                                                                                                                                                                                                                                                                                                                                                                                                                                                                                                                                                                                                                                                                                                                                                                                                                                                                                                                                      |
| 57* | A/Netherlands/363/2006                                                                                                                                                                                                                                                                                                                                                                                                                                                                                                                                                                                                                                                                                                                                                                                                                                                                                                                                                                                                                                                                                                                                                                |

|            |                                                                                                                                                                                                                                                                                                        |
|------------|--------------------------------------------------------------------------------------------------------------------------------------------------------------------------------------------------------------------------------------------------------------------------------------------------------|
| <b>58*</b> | <b>A/Brisbane/10/2007, A/Hiroshima/52/2005, A/Netherlands/34/2010, A/Netherlands/348/2007, A/Netherlands/377/2008, A/Netherlands/548/2008, A/Netherlands/63/2011, A/Netherlands/69/2007, A/Netherlands/69/2009, A/Netherlands/761/2009, A/Netherlands/9/2010, A/Perth/16/2009, A/Wisconsin/67/2005</b> |
| <b>59</b>  | <b>A/Brisbane/10/2007, A/Netherlands/34/2010, A/Netherlands/348/2007, A/Netherlands/377/2008, A/Netherlands/63/2011, A/Netherlands/69/2007, A/Netherlands/69/2009, A/Netherlands/761/2009, A/Netherlands/9/2010, A/Perth/16/2009</b>                                                                   |

<sup>a</sup> Event numbering corresponds to Fig. 2.

\* Events involving HA are depicted as bold twines in the tanglegrams (Fig. 2)

**TABLE S5.** Positively selected sites within all ORFs selected by IFEL, MEME, FUBAR, and DEPS. The images can be zoomed to show details.

| ORF    | Codon     | Location                                                                   | Antigenic site | Amino Acid                         | Year                                                 | Antigenic cluster                  | IFEL <sup>9</sup> | MEME <sup>2</sup> | FUBAR <sup>3</sup> | DEPS <sup>10</sup> |
|--------|-----------|----------------------------------------------------------------------------|----------------|------------------------------------|------------------------------------------------------|------------------------------------|-------------------|-------------------|--------------------|--------------------|
| PB2    | 553       | Cap binding (9, 10)<br>NP interaction (9, 10)<br>RNA binding (11)          |                | I                                  | 1968-2011                                            | All                                |                   |                   | √                  | √ (I)              |
|        | 697       | PB1 interaction (9, 10)<br>NP interaction (9, 10)<br>Importin binding (11) |                | V                                  | 1989-1996                                            | S187-WU95                          |                   |                   |                    |                    |
|        |           |                                                                            |                | L                                  | 1968-1996                                            | H68-WU95                           |                   |                   |                    |                    |
| PB1    | 633       | PB1 interaction (9, 10)<br>PB1-N40                                         |                | I                                  | 1995-2011                                            | BE92-PE09                          |                   |                   |                    | √ (I)              |
|        |           |                                                                            |                | S                                  | 1968-2011                                            | All                                |                   | √                 |                    |                    |
| PB1-F2 | 23        |                                                                            |                | T                                  | 1994                                                 | BE92                               |                   |                   |                    |                    |
|        |           |                                                                            |                | S                                  | 1968-2011                                            | All                                |                   |                   |                    |                    |
|        | 90        |                                                                            |                | N                                  | 1969, 1972, 1977, 1986, 1989, 1990, 1992, 1995, 1996 | HK68, TX77, BK79, S187, BE89, WU95 |                   |                   |                    | √ (N)              |
|        |           |                                                                            |                | D                                  | 1977                                                 | VI75                               |                   |                   |                    |                    |
|        | 87        | Endonuclease domain (11)                                                   |                | G                                  | 1968-1975, 1977, 2005                                | HK68-TX77                          |                   |                   |                    | √ (N)              |
|        |           |                                                                            |                | N                                  | 1975, 1976, 1979-2011                                | EN72-PE09                          |                   |                   |                    |                    |
|        | 277       | PB1 binding (11)<br>PA-N155/PA-N182                                        |                | A                                  | 1968-2011                                            | All                                |                   |                   | √                  |                    |
|        |           |                                                                            |                | G                                  | 1989                                                 | S187                               |                   |                   |                    |                    |
|        |           |                                                                            |                | F                                  | 1968-1985, 1993, 2001                                | H68-BK79, BE92, SY97               |                   |                   |                    |                    |
|        |           |                                                                            |                | Y                                  | 1985-1989                                            | BK79-PE09                          |                   |                   | √                  |                    |
| PA     | 311       | PB1 binding (11)<br>PA-N155/PA-N182                                        |                | H                                  | 1989                                                 | S187                               |                   |                   |                    |                    |
|        |           |                                                                            |                | M                                  | 1968-1986, 1988-1991, 1993, 1995, 2004, 2005, 2007   | HK68-S187, BE92, WU95, FU02, CA04  |                   |                   |                    |                    |
|        | 437       | PB1 binding (11)<br>PA-N155/PA-N182                                        |                | I                                  | 1987-2011                                            | S187-PE09                          |                   |                   |                    | √ (M)              |
|        |           |                                                                            |                | V                                  | 1995                                                 | WU95                               |                   |                   |                    |                    |
|        | 486       | PB1 binding (11)<br>PA-N155/PA-N182                                        |                | Y                                  | 1968-2004, 2006                                      | HK68-CA04                          |                   |                   | √                  |                    |
|        |           |                                                                            | H              | 1995-1997, 2005-2011               | BE92-PE09                                            |                                    |                   |                   |                    |                    |
| HA*    | 549       | PB1 binding (11)<br>PA-N155/PA-N182                                        |                | I                                  | 1968-2011                                            | All                                |                   |                   | √                  |                    |
|        |           |                                                                            |                | V                                  | 1988                                                 | S187                               |                   |                   |                    |                    |
|        | 11        |                                                                            |                | L                                  | 1968-2011                                            | All                                |                   |                   | √                  |                    |
|        |           |                                                                            |                | F                                  | 1968-1991                                            | HK68-S187                          |                   |                   |                    |                    |
|        | 12        |                                                                            |                | L                                  | 1981, 1982, 1989-2011                                | BK79-PE09                          |                   |                   |                    | √ (L)              |
|        |           |                                                                            |                | S                                  | 1985                                                 | BK79                               |                   |                   |                    |                    |
|        |           |                                                                            |                | C                                  | 1968-2011                                            | All                                |                   |                   |                    |                    |
|        | 47        | HA1 [81]                                                                   |                | Y                                  | 1971                                                 | HK68                               |                   |                   | √                  |                    |
|        |           |                                                                            |                | H                                  | 1993                                                 | BE92                               |                   |                   |                    |                    |
|        |           |                                                                            |                | R                                  | 2010                                                 | PE09                               |                   |                   |                    |                    |
| 79     | HA1 [63]  |                                                                            | D              | 1968, 1970-1975                    | HK68, EN72                                           |                                    |                   |                   | √ (N)              |                    |
|        |           |                                                                            | N              | 1968-1970, 1973-2011               | All                                                  |                                    |                   |                   |                    |                    |
| 95     | HA1 [79]  |                                                                            | F              | 1968-2011                          | All                                                  |                                    |                   |                   | √ (L)              |                    |
|        |           |                                                                            | L              | 1975, 1990, 1992, 1994             | EN72, S187-BE92                                      |                                    |                   |                   |                    |                    |
| 128    | HA1 [112] |                                                                            | V              | 1968-2011                          | All                                                  |                                    |                   | √                 |                    |                    |
|        |           |                                                                            | I              | 1970, 1980, 2003, 2006, 2009       | HK68, BK79, FU02, CA04                               |                                    |                   |                   |                    |                    |
|        |           |                                                                            | I              | 1968-1994, 1996                    | HK68-WU95                                            |                                    |                   |                   |                    |                    |
| 137    | HA1 [121] |                                                                            | T              | 1969, 1983, 1990-1993, 1995-1998   | HK68, BK79-WU95                                      |                                    |                   | √                 | √ (T)              |                    |
|        |           |                                                                            | N              | 1996-2011                          | WU95-PE09                                            |                                    |                   |                   |                    |                    |
| 149    | HA1 [133] |                                                                            | N              | 1968-1977, 1992, 1993, 1996-2011   | HK68-TX77, BE89, WU95-PE09                           |                                    |                   |                   |                    |                    |
|        |           |                                                                            | S              | 1979-1993                          | BK79-BE89                                            |                                    |                   | √                 |                    |                    |
| HA*    | 151       | HA1 [135]                                                                  |                | D                                  | 1992-1998                                            | BE92-WU95                          |                   |                   |                    |                    |
|        |           |                                                                            |                | G                                  | 1968-1993                                            | HK68-S187, BE92, WU95              |                   |                   |                    |                    |
|        | 153       | HA1 [137]                                                                  |                | E                                  | 1989-1992                                            | BE89                               |                   |                   |                    |                    |
|        |           |                                                                            |                | G                                  | 1992                                                 | BE89                               |                   |                   | √                  | √                  |
|        |           |                                                                            |                | D                                  | 1991-1993                                            | BE89                               |                   |                   |                    |                    |
|        |           |                                                                            |                | K                                  | 1993-1996                                            | BE92, WU95                         |                   |                   |                    |                    |
|        | 154       | HA1 [136]                                                                  |                | T                                  | 1985-2011                                            | WU95-PE09                          |                   |                   |                    |                    |
|        |           |                                                                            |                | N                                  | 1968                                                 | HK68                               |                   |                   |                    |                    |
|        | 155       | HA1 [137]                                                                  |                | I                                  | 1971                                                 | HK68                               |                   |                   |                    |                    |
|        |           |                                                                            |                | S                                  | 1971, 1972, 1976, 1977, 1982, 1998-2011              | HK68-VI75, BK79, SY97-PE09         |                   |                   |                    |                    |
| 161    | HA1 [145] |                                                                            | Y              | 1976-1986, 1988-1998               | TX77-SY97                                            |                                    | √                 | √                 | √                  | √ (S)              |
|        |           |                                                                            | G              | 1977                               | VI75                                                 |                                    |                   |                   |                    |                    |
| 160    | HA1 [144] |                                                                            | H              | 1987                               | S187                                                 |                                    |                   |                   |                    |                    |
|        |           |                                                                            | C              | 1987, 1993                         | S187, BE92                                           |                                    |                   |                   |                    |                    |
| 161    | HA1 [145] |                                                                            | A              | 1968-2011                          | All                                                  |                                    |                   |                   |                    |                    |
|        |           |                                                                            | T              | 1982, 1991, 1993, 1998             | BK79-WU95                                            |                                    |                   | √                 | √                  | √ (ST)             |
|        |           |                                                                            | S              | 1986, 1993, 1995, 2004, 2005, 2008 | BK79, BE92, WU95, CA04                               |                                    |                   |                   |                    |                    |
|        |           |                                                                            | G              | 1968-1972                          | HK68                                                 |                                    |                   |                   |                    |                    |
| 171    | HA1 [155] |                                                                            | D              | 1971-1983, 2002, 2003, 2006        | HK68-BK79, SY97, CA04                                |                                    |                   |                   |                    |                    |
|        |           |                                                                            | N              | 1982, 1999, 2001-2010              | BK79, SY97-PE09                                      |                                    |                   |                   |                    |                    |
|        |           |                                                                            | V              | 1985-1998                          | BK79-WU95                                            |                                    |                   |                   | √                  |                    |
|        |           |                                                                            | I              | 1997, 1998, 2000                   | SY97                                                 |                                    |                   |                   |                    |                    |
| 161    | HA1 [145] |                                                                            | K              | 2009, 2011                         | PE09                                                 |                                    |                   |                   |                    |                    |
|        |           |                                                                            | I              | 1968, 1971, 1974, 1975             | HK68-VI75                                            |                                    |                   |                   |                    |                    |
|        |           |                                                                            | S              | 1968-1975                          | HK68, EN72                                           |                                    |                   |                   |                    |                    |
|        |           |                                                                            | N              | 1973, 1976-1996, 2004-2011         | EN72-S187, BE92, CA04, PE09                          |                                    | √                 | √                 | √                  | √ (IK)             |
| 171    | HA1 [155] |                                                                            | C              | 1974                               | EN72                                                 |                                    |                   |                   |                    |                    |
|        |           |                                                                            | R              | 1974, 1975                         | EN72                                                 |                                    |                   |                   |                    |                    |
|        |           |                                                                            | K              | 1977, 1979, 1988-2004              | VI75, BK79-FU02                                      |                                    |                   |                   |                    |                    |
|        |           |                                                                            | T              | 1968-1972, 2002-2011               | HK68, FU02-PE09                                      |                                    |                   |                   |                    |                    |

|             |           |                          |            |                                         |                                    |                             |   |   |       |
|-------------|-----------|--------------------------|------------|-----------------------------------------|------------------------------------|-----------------------------|---|---|-------|
|             |           |                          | K          | 1968-1977, 1985, 1989-1998              | HK68-SI87, BE92, WU95              |                             |   |   |       |
|             |           |                          | E          | 1979-1993                               | BK79-BE89                          |                             |   |   | √ (K) |
| 172         | HA1 [156] | B (12, 13)               | H          | 2002-2011                               | FU02-PE09                          |                             |   |   |       |
|             |           |                          | C          | 1997-2003, 2005                         | SY97, CA04                         |                             |   |   |       |
|             |           |                          | G          | 1968-1977                               | HK68-VI75                          |                             |   |   |       |
|             |           |                          | E          | 1976-1998                               | TX77-WU95                          |                             |   |   |       |
|             |           |                          | C          | 1991                                    | SI87                               |                             |   |   |       |
| 174         | HA1 [156] | B (12, 13)               | D          | 1991, 1992, 1995, 1996                  | BE89, BE92                         |                             |   |   | √     |
|             |           |                          | K          | 1997-2009                               | SY97-CA04                          |                             |   |   |       |
|             |           |                          | N          | 1999, 2009-2011                         | SY97, PE09                         |                             |   |   |       |
|             |           |                          | R          | 2003, 2009                              | SY97, CA04                         |                             |   |   |       |
|             |           |                          | S          | 1968                                    | HK68                               |                             |   |   |       |
|             |           |                          | R          | 1971                                    | HK68                               |                             |   |   |       |
| 175         | HA1 [159] | B (12, 13)               | N          | 1974, 1975, 2003                        | EN72, SY97                         | √                           | √ | √ | √ (Q) |
|             |           |                          | Y          | 1985-2003                               | BK79-FU02                          |                             |   |   |       |
|             |           |                          | C          | 1987                                    | SI87                               |                             |   |   |       |
|             |           |                          | F          | 1995, 2004-2011                         | WU95, FU02-PE09                    |                             |   |   |       |
|             |           |                          | D          | 1968-1977, 1991-1993, 1995-1998         | HK68-TX77, BE89-SY97               |                             |   |   |       |
| 188         | HA1 [172] | D (12, 13)               | G          | 1979-1996                               | BK79-WU95                          | √                           |   |   |       |
|             |           |                          | E          | 1999-2011                               | SY97-PE09                          |                             |   |   |       |
|             |           |                          | H          | 1968-2011                               | All                                |                             |   |   |       |
| 199         | HA1 [183] |                          | L          | 2002, 2005, 2006, 2009                  | FU02-PE09                          |                             |   |   | √ (L) |
|             |           |                          | S          | 1968                                    | HK68-                              |                             |   |   |       |
|             |           |                          | I          | 1966, 1987                              | BK79, SI87                         |                             |   |   |       |
| 202         | HA1 [186] | B (12, 13)               | G          | 2001-2011                               | SY97-PE09                          |                             |   |   | √ (V) |
|             |           |                          | V          | 2003-2005                               | FU02, CA04                         |                             |   |   |       |
|             |           |                          | S          | 1968-1975, 1990-2004, 2006              | HK68, EN72, SI87-CA04              |                             |   |   |       |
|             |           |                          | N          | 1971, 1973-1991                         | HK68, EN72, TX77-SI87              |                             |   |   |       |
|             |           |                          | D          | 1975-1977                               | VI75                               | √                           | √ | √ |       |
| HA* (cont.) | 209       | HA1 [193]                | B (12, 13) | K                                       | 1982, 1989                         | BK79, BE89                  |   |   |       |
|             |           |                          | R          | 2004                                    | CA04                               |                             |   |   |       |
|             |           |                          | F          | 2005-2011                               | CA04, PE09                         |                             |   |   |       |
|             |           |                          | L          | 1968-2011                               | All                                |                             |   |   |       |
|             | 210       | HA1 [194]                | B (12, 13) | I                                       | 1994, 1995, 1997, 1999             | BE92-SY97                   |   |   | √ (I) |
|             |           |                          | P          | 2007                                    | CA04                               |                             |   |   |       |
|             |           |                          | A          | 1968                                    | HK68                               |                             |   |   |       |
|             |           |                          | T          | 1971, 1973                              | HK68, EN72                         |                             |   |   |       |
|             | 214       | HA1 [196]                | B (12, 13) | S                                       | 1996, 1999, 2010                   | BE92-SY97, PE09             |   |   | √ (S) |
|             |           |                          | E          | 2004                                    | FU02                               |                             |   |   |       |
|             |           |                          | I          | 1968-1981                               | HK68-BK79                          |                             |   |   |       |
|             | 229       | HA1 [213]                | D (12, 13) | V                                       | 1975-1977, 1982-2011               | EN72, VI77, BK79-PE09       |   |   | √ (V) |
|             |           |                          | M          | 1968                                    | HK68                               |                             |   |   |       |
|             |           |                          | L          | 1968-1996                               | HK68-WU95                          |                             |   |   |       |
|             | 242       | HA1 [226]                | D (12, 13) | Q                                       | 1970, 1990, 1992-1994, 1996        | HK68, SI87, BE92, WU95      | √ | √ | √ (Q) |
|             |           |                          | P          | 1972                                    | HK68                               |                             |   |   |       |
|             |           |                          | I          | 1994-1997, 2003-2011                    | BE92-PE09                          |                             |   |   |       |
|             |           |                          | V          | 1995-2003                               | WU95-FU02                          |                             |   |   |       |
|             |           |                          | R          | 1968-1976, 1980-2011                    | HK68-PE09                          |                             |   |   |       |
|             | 245       | HA1 [229]                | D (12, 13) | G                                       | 1975, 1977, 1979, 1989, 1993, 1998 | EN72, TX77-SI87, BE92, SY97 |   |   | √     |
|             |           |                          | G          | 1996, 1998                              | WU95, SY97                         |                             |   |   |       |
|             |           |                          | T          | 1968                                    | HK68                               |                             |   |   |       |
|             |           |                          | N          | 1976, 1982, 1983, 1987, 1990, 1992-1996 | TX77-SI87, BE92, WU95              |                             |   |   |       |
|             | 278       | HA1 [262]                | E (12)     | I                                       | 1991                               | BE89                        |   |   | √     |
|             |           |                          | S          | 1995-2011                               | WU95-PE09                          |                             |   |   |       |
|             |           |                          | A          | 1968-2011                               | All                                |                             |   |   |       |
|             | 320       | HA1 [304]                | C (12, 13) | P                                       | 1994, 1997                         | BE92, WU95                  |   |   | √     |
|             |           |                          | I          | 1968-2011                               | All                                |                             |   |   |       |
|             | 538       | HA2 [193], TM anchor     | T          | 1989, 1994, 1995, 2001                  | SI87, BE92-SY97                    |                             |   |   | √ (T) |
|             |           |                          | M          | 2004                                    | FU02                               |                             |   |   |       |
|             | 54        | RNA binding site (9, 10) | G          | 1968-2011                               | All                                |                             |   | √ |       |
|             |           | PB2 interaction (9)      | A          | 1972                                    | HK68                               |                             |   |   |       |
| NP          | 146       | RNA binding site (9, 10) | T          | 1968-2001                               | HK68-SY97                          |                             |   | √ |       |
|             |           | PB2 interaction (9)      | A          | 1975, 1977, 1988, 2001-2011             | EN72, VI75, SI87, SY97-PE09        |                             |   |   |       |
|             |           |                          | D          | 1968-1977                               | HK68-TX77                          |                             |   |   |       |
|             | 43        | Stalk                    | S          | 1979-1993, 1997, 2006                   | BK79-SI87, BE92, SY97, CA04        | √                           | √ |   |       |
|             |           |                          | N          | 1998-2011                               | BE88-PE09                          |                             |   |   |       |
|             |           |                          | A          | 1968                                    | HK68-TX77                          |                             |   |   |       |
|             | 46        | Stalk                    | S          | 1969                                    | HK68                               |                             |   |   | √ (P) |
|             |           |                          | P          | 1973, 1977, 1979-2011                   | EN72, VI75, BK79-PE09              |                             |   |   |       |
|             |           |                          | P          | 1968-1993                               | HK68-BE92                          |                             |   |   |       |
| NA          | 52        | Stalk                    | L          | 1969, 1991-2011                         | HK68, BE89-PE09                    |                             |   |   | √ (L) |
|             |           |                          | I          | 1968-1986, 1988                         | HK68-SI87                          |                             |   |   |       |
|             | 56        | Stalk                    | T          | 1975, 1987-2011                         | EN72, SI87-PE09                    |                             |   |   | √ (K) |
|             |           |                          | K          | 1992, 1993, 2001                        | BE89, BE92, SY97                   |                             |   |   |       |
|             |           |                          | G          | 1968                                    | HK68-WU95                          |                             |   |   |       |
|             | 127       | Head                     | S          | 1977, 1988, 1989, 1992                  | VI75, SI87, BE89, BE92             |                             |   |   | √ (S) |
|             |           |                          | D          | 1988, 1995-2010                         | SI87, WU95-PE09                    |                             |   |   |       |
|             |           |                          | N          | 2011                                    | PE09                               |                             |   |   |       |

|     |                      |                        |   |                                        |                                    |   |       |
|-----|----------------------|------------------------|---|----------------------------------------|------------------------------------|---|-------|
|     |                      |                        | T | 1968-2011                              | <b>A</b>                           |   |       |
| 148 | Head                 |                        | E | 1996                                   | WU95                               | √ |       |
|     |                      |                        | I | 1996                                   | WU95                               |   |       |
|     |                      |                        | K | 2001                                   | SY97                               |   |       |
| 199 | Head                 | B (12, 13)             | K | 1968-1989, 2003-2011                   | HK68-SI87, SY97-PE09               |   |       |
|     |                      |                        | E | 1971, 1989-2003                        | HK68, SI87-FU02                    | √ |       |
|     |                      |                        | D | 1988                                   | SI87                               |   |       |
| 253 | Head                 |                        | R | 1968-1972                              | HK68, EN72                         |   | √ (K) |
|     |                      |                        | K | 1970, 1972-2011                        | HK68, EN72-PE09                    |   |       |
|     |                      |                        | P | 1968-2000                              | HK68-WU95                          |   |       |
|     |                      |                        | S | 1976, 1992                             | VI75, BE89                         |   |       |
|     |                      |                        | Q | 1997, 1998                             | WU95, SY97                         |   |       |
| 267 | Head                 |                        | K | 1999                                   | SY97                               |   | √     |
|     |                      |                        | T | 2001-2011                              | SY97-PE09                          |   |       |
|     |                      |                        | L | 2001                                   | SY97                               |   |       |
|     |                      |                        | S | 2001                                   | SY97                               |   |       |
| 308 | Head                 |                        | E | 1968-1970                              | HK68                               |   | √ (K) |
|     |                      |                        | K | 1969-2011                              | HK68-PE09                          |   |       |
| 328 | Head                 | C (12, 13)             | N | 1968-1976, 1992                        | HK68-TX77, BE89                    |   | √ (K) |
|     |                      |                        | K | 1974, 1975, 1977-2011                  | EN72-PE09                          |   |       |
|     |                      |                        | N | 1968-1975                              | HK68, EN72                         |   |       |
| 334 | Head                 | C (12, 13)             | K | 1969                                   | HK68                               |   | √ (S) |
|     |                      |                        | S | 1971, 1975-2011                        | HK68-PE09                          |   |       |
|     |                      |                        | R | 1968-1994                              | HK68-WU95                          |   |       |
| 338 | Head                 | C (12, 13)             | Q | 1985, 1988, 1994                       | BK79, SI87, BE92                   | √ |       |
|     |                      |                        | L | 1992, 1994-2011                        | BE89-PE09                          |   |       |
|     |                      |                        | W | 1993-1996                              | BE92                               |   |       |
| 339 | Head                 | C (12, 13)             | N | 1968-1999                              | HK68-SY97                          |   | √     |
|     |                      |                        | K | 1993                                   | BE92                               |   |       |
|     |                      |                        | D | 1997, 1999-2011                        | WU95-PE09                          |   |       |
|     |                      |                        | L | 1968-1970, 1982, 1985-2006             | HK68, BK79-CA04                    |   |       |
| 370 | Head                 | C (12, 13)             | S | 1971-1983, 1995, 1997, 1998, 2006-2011 | HK68-BK79, BE92-SY97, CA04, PE09   | √ | √ (S) |
|     |                      |                        | F | 1997, 1998                             | SY97                               |   |       |
|     |                      |                        | S | 1968-2006                              | HK68-CA04                          |   |       |
| 372 | Head                 |                        | L | 1977, 1996, 1992, 1993, 2007-2011      | VI75, BK79, BE89, BE92, CA04, PE09 |   | √ (L) |
|     |                      |                        | D | 1968-1983, 1998                        | HK68-BK79, SY97                    |   |       |
|     |                      |                        | A | 1975                                   | VI75                               |   |       |
| 401 | Head                 | A (12, 13)             | G | 1982, 1985, 1987-1997, 1999-2011       | BK79, SI87-PE09                    | √ |       |
|     |                      |                        | K | 1985, 1986, 1988                       | BK79, SI87                         |   |       |
|     |                      |                        | S | 1993                                   | BE92                               |   |       |
| 437 | Head                 |                        | W | 1968-2003                              | HK68-FU02                          |   | √ (L) |
|     |                      |                        | L | 1982, 1999-2011                        | BK79, SY97-PE09                    |   |       |
| 465 | Head                 |                        | N | 1968                                   | <b>A</b>                           |   | √     |
|     |                      |                        | D | 1974                                   | EN72                               |   |       |
|     |                      |                        | G | 2005                                   | CA04                               |   |       |
| M1  | 166                  | C-terminal domain (11) | V | 1968-1985, 1987-2011                   | <b>A</b>                           | √ |       |
|     |                      |                        | I | 1985, 1986, 1989                       | BK79, SI87                         |   |       |
|     |                      |                        | A | 1968                                   | <b>A</b>                           |   |       |
|     |                      |                        | T | 1976, 1979, 1988, 2001, 2003           | VI75, BK79, SI87, SY97, FU02       |   | √ (T) |
| 58  | dsRNA binding (11)   |                        | V | 1993                                   | BE89                               |   |       |
|     |                      |                        | S | 1995                                   | WU95                               |   |       |
| 65  | dsRNA binding (11)   |                        | V | 1968-2011                              | <b>A</b>                           | √ |       |
|     |                      |                        | L | 1976                                   | VI75                               |   |       |
|     |                      |                        | E | 1968-2011                              | <b>A</b>                           |   |       |
| NS1 | 71                   | dsRNA binding (11)     | K | 1977, 1995                             | VI75, BE92, WU95                   | √ |       |
|     |                      |                        | D | 1991, 1992                             | BE89                               |   |       |
|     |                      |                        | G | 2001-2003                              | SY97, FU02                         |   |       |
| 84  | Effector domain (11) |                        | A | 1968-1971                              | HK68                               |   | √ (T) |
|     |                      |                        | T | 1971-2011                              | <b>A</b>                           |   |       |
|     |                      |                        | M | 1968-2011                              | <b>A</b>                           |   |       |
| 129 | Effector domain (11) | TCE 122-130 (15)       | T | 1991-1993, 1995, 2009, 2010            | BE89, BE92, CA04, PE09             |   | √ (T) |
|     |                      |                        | I | 1993-1996, 2003, 2008                  | BE92-SY97, CA04                    |   |       |

<sup>a</sup> P<0.05

<sup>b</sup> Posterior probability of  $\geq 0.9$

<sup>c</sup> Bayes Factor > 20

<sup>d</sup> The preferred residue(s) is/are indicated in parentheses.

\* Location HA1/HA2 numbering is indicated between brackets.

TCE, T-cell epitope

dsRNA, double stranded RNA

## References

1. **Smith DJ, Lapedes AS, de Jong JC, Bestebroer TM, Rimmelzwaan GF, Osterhaus AD, and Fouchier RA.** 2004. Mapping the antigenic and genetic evolution of influenza virus. *Science* **305**:371-376.
2. **de Jong JC, Donker GA, Meijer A, Hoek Wvd, Rimmelzwaan GF, and Osterhaus AD.** 2011. Het influenzaseizoen 2010/2011 in Nederland: het nieuwe A(H1N1)-virus van 2009 blijft actief. *Ned Tijdschr Med Microbiol* **19**:21-27.
3. **Vijaykrishna D, Bahl J, Riley S, Duan L, Zhang JX, Chen H, Peiris JS, Smith GJ, and Guan Y.** 2008. Evolutionary dynamics and emergence of panzootic H5N1 influenza viruses. *PLoS Pathog.* **4**:e1000161.
4. **Suchard MA, Weiss RE, and Sinsheimer JS.** 2001. Bayesian selection of continuous-time Markov chain evolutionary models. *Mol. Biol. Evol.* **18**:1001-1013.
5. **Smith GJ, Bahl J, Vijaykrishna D, Zhang J, Poon LL, Chen H, Webster RG, Peiris JS, and Guan Y.** 2009. Dating the emergence of pandemic influenza viruses. *Proc. Natl. Acad. Sci. U. S. A.* **106**:11709-11712.
6. **Rambaut A, Pybus OG, Nelson MI, Viboud C, Taubenberger JK, and Holmes EC.** 2008. The genomic and epidemiological dynamics of human influenza A virus. *Nature* **453**:615-619.
7. **Kass RE, and Raftery AE.** 1995. Bayes factors. *J Am Stat Assoc* **90**:773-795.
8. **Nagarajan N, and Kingsford C.** 2010. GiRaF: robust, computational identification of influenza reassortments via graph mining. *Nucleic Acids Res.* **39**:e34.
9. **Naffakh N, Tomoiu A, Rameix-Welti MA, and van der Werf S.** 2008. Host restriction of avian influenza viruses at the level of the ribonucleoproteins. *Annu. Rev. Microbiol.* **62**:403-424.
10. **Boulo S, Akarsu H, Ruigrok RW, and Baudin F.** 2007. Nuclear traffic of influenza virus proteins and ribonucleoprotein complexes. *Virus Res.* **124**:12-21.
11. **Du J, Cross TA, and Zhou HX.** 2012. Recent progress in structure-based anti-influenza drug design. *Drug Discov. Today* **17**:1111-1120.
12. **Wilson IA, and Cox NJ.** 1990. Structural basis of immune recognition of influenza virus hemagglutinin. *Annu. Rev. Immunol.* **8**:737-771.



13. **Wiley DC, Wilson IA, and Skehel JJ.** 1981. Structural identification of the antibody-binding sites of Hong Kong influenza haemagglutinin and their involvement in antigenic variation. *Nature* **289**:373-378.
14. **DiBrino M, Parker KC, Margulies DH, Shiloach J, Turner RV, Biddison WE, and Coligan JE.** 1994. The HLA-B14 peptide binding site can accommodate peptides with different combinations of anchor residues. *J. Biol. Chem.* **269**:32426-32434.
15. **Man S, Newberg MH, Crotzer VL, Luckey CJ, Williams NS, Chen Y, Huczko EL, Ridge JP, and Engelhard VH.** 1995. Definition of a human T cell epitope from influenza A non-structural protein 1 using HLA-A2.1 transgenic mice. *Int. Immunol.* **7**:597-605.
